# 1 Implantation-Competent Blastocyst-Like 2 Structures from Mouse Pluripotent Stem Cells

3  
4 **Cody Kime<sup>1,2,8</sup>, Hiroshi Kiyonari<sup>3</sup>, Satoshi Ohtsuka<sup>4</sup>, Eiko Kohbayashi<sup>5</sup>, Michio Asahi<sup>6</sup>, Shinya  
5 Yamanaka<sup>1,7</sup>, Masayo Takahashi<sup>2</sup>, and Kiichiro Tomoda<sup>1,6</sup>**

6  
7 1 Gladstone Institute of Cardiovascular Disease, San Francisco, CA 94158, USA

8 2 Lab of Retinal Regeneration, RIKEN Center for Biosystems Dynamics Research, Kobe 650-0047, Japan

9 3 Animal Resource Development Unit and Genetic Engineering Team, RIKEN Center for Life Science

10 Technologies, Kobe 650-0047, Japan

11 4 Department of Life Science, Medical Research Institute, Kanazawa Medical University, Ishikawa 920-  
12 0293, Japan

13 5 Second Department of Internal Medicine, Osaka Medical College, Osaka 569-8686, Japan

14 6 Department of Pharmacology, Faculty of Medicine, Osaka Medical College, Osaka 569-8686, Japan

15 7 Center for iPS Cell Research and Application (CiRA), Kyoto University, Kyoto 606-8507, Japan

16 8 Lead Contact

17  
18 **Corresponding Authors:** Correspondence should be addressed to C.K. (cody.kime@riken.jp) or K.T.  
19 (pha050@osaka-med.ac.jp).

20

21 **SUMMARY**

22 Soon after fertilization, the few totipotent cells of mammalian embryos diverge to form a structure  
23 called the blastocyst (BC). Although numerous types of cells, including germ cells and extended  
24 pluripotency stem cells, have been generated from pluripotent stem cells (PSCs) *in-vitro*, generating  
25 functional BCs only from PSCs has not yet been reported. Here we describe induced self-organizing 3D  
26 BC-like structures (iBCs) generated from mouse PSC culture *in-vitro*. Resembling natural BCs, iBCs have a  
27 blastocoel-like cavity and were formed with outer cells that are positive for trophoctoderm lineage  
28 markers and with inner cells that are positive for pluripotency markers. iBCs transplanted to  
29 pseudopregnant mice uteruses implanted, induced decidualization, and exhibited growth and  
30 development before resorption, demonstrating that iBCs are implantation-competent. iBC production  
31 required the transcription factor Prdm14 and iBC precursor intermediates concomitantly activate the  
32 MERVL totipotency related cleavage stage reporter. Thus, our system may contribute to understanding  
33 molecular mechanisms underpinning totipotency, embryogenesis, and implantation.

34

35 **KEYWORDS**

36 pluripotent stem cells; early embryo; implantation; cell biology; totipotency; reproduction; cell plasticity;  
37 blastocyst

38

39 **HIGHLIGHTS**

- 40 -Pluripotent cells self-organize blastocyst-like structures in defined conditions.
- 41 -Structures have several extraembryonic and embryonic characteristics of blastocysts.
- 42 -Structures can implant in the uterus and grow before resorption.
- 43 -Totipotency is implicated concomitantly at loci that originate induced blastocysts.

44

## 45 INTRODUCTION

46 During early mammalian development, a fertilized egg (zygote) completely intersects the animal life  
47 cycle upon zygotic genome activation (ZGA): the event where gamete totipotent genomes of the  
48 pronucleus are epigenetically activated and rapidly enter cleavage (Seydoux and Braun, 2006; Wu et al.,  
49 2017). The zygote cleaves and symmetry later bifurcates to form the blastocyst (BC) in preparation for  
50 implantation and differentiation. The BC is a 3D ball-like structure of three characteristic parts: the  
51 extraembryonic (ExEm) outer layer of trophoblast (TE) lineage cells, the pluripotent cells of the inner  
52 cell mass (ICM), and a fluid filled cavity called the blastocoel. Upon implantation, trophoblasts  
53 contribute to the ExEm tissue of the placenta, and the ICM gives rise to embryo proper and some ExEm  
54 tissues. Emerging trophoblasts and pluripotent cells result from the first differentiation event in  
55 mammalian development, initiated in cleaving totipotent cells that begin to polarize just before the BC  
56 forms (Hirate et al., 2015; Nishioka et al., 2009; Yu et al., 2016; Stephenson et al., 2010).

57 Implantation is crucial to natural development and establishes the physical connection between the  
58 mother and early embryo that supports embryonic (Em) development through the rest of the  
59 pregnancy. Implantation is tightly regulated at several molecular and cellular levels: apposition,  
60 adhesion and invasion of the TE lineage cells, and subsequent decidualization of the endometrial wall of  
61 the uterus. ExEm tissues thereafter increase growth and differentiation while the ICM differentiates to  
62 form the embryo proper and additional ExEm tissues. Implantation-competent BCs require TE cells  
63 expressing *Cdx2* (Meissner and Jaenisch, 2006), and molecular mechanisms involving *Lpar3*, *Lif*, *Bmp*,  
64 and others signal the interface between the TE and the receptive uterus (Cha et al., 2012; Wang and  
65 Dey, 2006). These events must occur in a short developmental window: failed implantation is a major  
66 cause of early pregnancy loss in humans (Norwitz et al., 2001; Cha et al., 2012). Defective embryos also  
67 fail later and begin the resorption process in which maternal immune cells degrade the embryo (Cossée  
68 et al., 2000; Flores et al., 2014).

69 The zygote and cleavage stages exhibit true totipotency, isogenically preceding all ExEm (vegetal)  
70 and Em (animal) cell bi-directional development toward entire organisms. From plant tissue cultures,  
71 specific cytokine, vitamin, and plant hormone (auxins) ratios are adjusted to induce totipotent transient  
72 cells for propagating isogenic embryos (Steward et al., 1958). In mammals, isogenic 3D BCs from  
73 differentiated cells are both attractive and elusive. Recent progress in PSC research challenges this  
74 barrier by generating functional germ cells that give rise to offspring by *in-vitro* fertilization (Hikabe et  
75 al., 2016), and some reports show stem cells with extended/bi-directional pluripotency in chimeric mice  
76 (Macfarlan et al., 2012; Yang et al., 2017). However, experiments inducing implantation-competent  
77 isogenic BCs entirely from PSCs are unprecedented.

78 In reprogramming and conversion experiments with specific cytokines, nutrient, and lipid (Kime et  
79 al., 2016), we frequently observed tissues and hemispheres that resemble BCs. Inspired by these  
80 observations, we developed a stepwise regime to readily induce BC-like structures from PSCs *in-vitro*,  
81 which we term iBCs. iBCs demonstrate implantation-competence since transplant into pseudopregnant  
82 mice induced focal decidualization in the uterus, recruited a maternal blood supply, and expanded the  
83 embryonic cavity. Some implanted iBCs produced many cell types similar to implanted embryos but  
84 failed to develop further due to embryonic resorption. A live pluripotency reporter suggests  
85 pluripotency is partially recovered in the putative ICM of iBCs, and some iBC express *Zscan4*. Utilizing

86 the murine endogenous retrovirus (*MERVL*) live totipotency-related reporter, we found iBC precursors  
87 and cells where iBCs originate may indicate ZGA mechanisms (Macfarlan et al., 2012; Wu et al., 2017).  
88 Further analysis of Yap protein distribution in iBC precursors and early iBCs was similar with cleavage  
89 stage cells polarizing through compaction toward emerging blastocysts (Nishioka et al., 2009;  
90 Stephenson et al., 2010; Bedzhov et al., 2014). We anticipate this approach may lead to simplified  
91 isogenic embryo production for research, medicine, and uncovering the intricacies of totipotency and  
92 implantation.

93

## 94 RESULTS

### 95 Efficient Conversion to Naive PSCs Produces Blastocyst-like Hemispheres

96 *In-vitro* pluripotency is characterized in two distinct states: a post-implantation epiblast state (primed)  
97 and a pre-implantation blastocyst ICM state (naive). Primed female PSCs have one active and one  
98 inactive X chromosome (Xa/Xi), but naive female PSCs have two Xas (Xa/Xa) (Payer et al., 2011). We  
99 previously presented defined conditions that enhanced iPSC cell reprogramming, and in primed to naive  
100 PSC conversion experiments, those conditions formed structures resembling early embryonic material.  
101 In the naive conversion experiments, we used a primed female mouse epiblast stem cell (mEpiSC) line  
102 that harbors a silent green fluorescent protein (GFP) transgene on the Xi chromosome (Xi-GFP, XGFP-).  
103 GFP is expressed upon reactivation of Xi to Xa (Xa-GFP, XGFP+), a hallmark of the ICM and often of  
104 cleavage stage cells (Kime et al., 2016; Monk and Harper, 1979; Okamoto et al., 2004; Bao et al., 2009).

105 Robust naive conversion frequently produced hemispheres with morphological characteristics we  
106 suspected to resemble BCs (Figure 1). XGFP+ cell clusters, which we found to be naive cells (Kime et al.,  
107 2016), were polar and internal to fluid-filled hemispherical domes of distinct large flat cells with  
108 ectodermal morphology resembling trophoblasts. Using immunocytochemistry, we found that these  
109 hemispheres initiated the fluid-filled cavity and had NANOG+XGFP+ inner cells with no bright DNA-stain  
110 punctae, which may indicate loss of heterochromatin usually found in scarce transient *Zscan4+ 2C*-like  
111 state cells in mouse naive PSCs (Akiyama et al., 2015; Wu et al., 2016). The inner cells were surrounded  
112 by spheroid DNA-stained punctae-enriched NANOG+XGFP- outer cells. These cell distributions and  
113 expression characteristics were similar to early differentiating cells of the morula. Also, the most-  
114 outward cells were flattened and NANOG-XGFP-, characteristic of lineage committed TE. (Figure 1A,  
115 Figure S1A).

116 In a short time, the outer XGFP- cells completely flattened, took on morphology similar to TE, and  
117 surrounded the expanding fluid-filled cyst, wherein only the XGFP+ polar mass of the hemisphere  
118 maintained XGFP+ and NANOG+ expression (Figure 1B,C, Figure S1B, Video S1). We regularly observed  
119 tens to hundreds of such characteristic hemispheres during our previous study (Figure 1D, Figure S1A,  
120 Kime et al., 2016). Time-course reverse transcription quantitative polymerase chain reaction (RT-qPCR)  
121 experiments of naive conversion experiments revealed the induction of *Prdm1(Blimp1)*, *Prdm14*, *Id1*,  
122 *Id2*, *Id3*, and *Id4* (Figure S1C). These powerful genes broadly regulate the genome and are curiously  
123 related to the cleavage stage, early embryo, and germ line preparation (Yang et al., 2017; Hiller et al.,  
124 2010; Yamaji et al., 2008; Luna-Zurita and Bruneau, 2013; Burton et al., 2013).

125 The composition and organization of hemispheres drew our attention since data continued to  
126 implicate a BC: the GFP+NANOG+ polar mass of cells corresponds to the ICM where pluripotent Xa/Xa

127 naive cells exist, and the cavity to a blastocoel. XGFP-NANOG- flattened cells had the morphology and  
128 organization of TE cells. Therefore, we checked hemispheres with an antibody specific to TROMA-I  
129 (KRT8), a well-characterized TE lineage marker. Indeed, the flattened TE morphology cells, but not  
130 XGFP+NANOG+ cells, expressed TROMA-I, and thus, the hemispheres are surrounded by XGFP-NANOG-  
131 TROMA-I+ cells (Figure 1C). Taken together, our efficient conversion of the primed state mEpiSCs to  
132 naive PSCs is concurrent with the generation of highly self-organized BC-like hemispheres.

### 133 **SMAD2/3 Signaling Inhibition and Stepwise Treatment Produces Self-Organizing Floating Blastocyst- 134 Like 3D Structures**

135 We tested several culture conditions to enhance the conversion efficiencies from primed to naïve PSCs.  
136 For example, adding the SMAD2/3 signaling pathway ALK5 inhibitor SB431542 had marginal effects on  
137 conversion efficiencies, yet we observed some small cell aggregates and BC-like spheres floating in the  
138 medium. We speculated that the floating spheres had BC-like properties as the hemispheres and the cell  
139 aggregates were precursors of the BC-like spheres. To yield floating BC-like structures more stably and  
140 efficiently, we optimized Phase 1 and 2 treatments with our defined supplements (Figure 2A), harvesting  
141 plate supernatants to low attachment plates on Day 6 and obtaining 5–30 floating BC-like structures by  
142 Day 7 (Figure S2A, Table S1). On Day 6 of purification, the floating structures did not stick together. Like  
143 late-hatched BCs, on Day 7 or 8, as the BC-like structures expanded, they drastically slowed growth and  
144 readily stuck together. Thus, we routinely isolated and pooled these structures at Day 7 for most  
145 downstream experiments (Figure 2B). We stained the DNA to clarify cell nuclei and found a compact  
146 ICM-like region and large flat TE-like cells surrounding a possible blastocoel similar to the hemispheres  
147 (Figure S2B). From these observations and more hereafter, we termed these structures induced  
148 blastocysts (iBCs).

149 Next, to ask if iBCs originate from a single source, we isolated the floating aggregate spheres that  
150 visibly lacked any particular polarity on Day 5.5 of induction (Figure 2C, left panel). The isolated spheres  
151 were individually cultured and regularly observed. Most grew and changed morphology: some  
152 developed into iBCs (Figure 2C). In some occasions, the isolated sphere appeared to change in the first  
153 17 hours, resulting in mostly large round cells among a few cell types. In the next 28 hours, the cells  
154 divided and grew to further change morphology, forming an apparent cavity and became an iBC (Figure  
155 2C). Prolonged culture thereafter resulted in paused growth and slightly reduced size of the iBC  
156 structure. These observations led us to speculate that stepwise treatment of PSC culture *in-vitro* induces  
157 floating aggregates as iBC precursors (iBC-PC) that morphologically develop and expand as iBCs.

158 To examine early polarity and inner/outer cell likeness, we collected iBC-PCs for immunofluorescent  
159 staining of YAP, a transcription factor involved in the first positional information and differentiation of  
160 the outer and inner cells of the early mouse embryo (Nishioka et al., 2009, Bedzhov et al., 2014). Similar  
161 to late cleavage stage non-polarized and early embryos (Hirate et al., 2015; Nishioka et al., 2009; Yu et  
162 al., 2016), YAP distribution was homogenously cytosolic and nuclear among all cells in some iBC-PCs with  
163 stochastic nuclear positioning (Figure 2D, left). However, other iBC-PCs more closely reflected 8C/16C  
164 compacting embryos undergoing outer/inner cell polarization; YAP was excluded only from the nucleus  
165 of the inner cells (Figure 2D, middle and right). We then examined emergent early iBCs and found that  
166 YAP was excluded from the nucleus of iBC inner cells and enriched in the nucleus of iBC outer cells,  
167 similar to natural early embryos (Figure 2E, Figure 3B), although iBC putative ICMs appeared smaller.

168 These strikingly similar distributions of YAP suggest the same molecular mechanisms and signaling  
169 pathways of early embryos are installed in iBC-PCs and early iBCs.

170 BCs have an outer layer of trophoblast cells and an ICM of pluripotent cells. Thus, BCs express genes  
171 important for inducing and maintaining both lineages. To analyze BC gene expression, we extracted RNA  
172 from individually isolated BCs and iBCs, along with isolated mEpiSC colonies for a similar sized control  
173 (Figure 3A). We also sampled RNA from earlier emerging individually isolated BCs and iBCs and mEpiSC  
174 colonies accordingly (Figure S2C). RT-qPCR experiments revealed that each iBC exhibits slightly different  
175 gene expression patterns as do BCs, suggesting there is a difference in the quality, developmental  
176 timing, or both, in iBC preparations. However, overall, the key genes analyzed are expressed in iBCs at  
177 closer levels to BCs than mEpiSCs except for a few genes (Figure 3A).

178 Many of the genes examined that are first activated or maintained in totipotent cleavage stage cells  
179 were found strongly upregulated in iBCs to match BCs when compared with mEpiSCs (Figure 3A, Figure  
180 S2C). Interestingly, one early BC and one early iBC had comparable detectable levels of *Zscan4* (Figure  
181 S2C). In addition, the cleavage stage and naive pluripotency-related gene *Zfp42* (*Rex1*) was activated in  
182 early iBCs sampled (four of six), despite being undetectable in mEpiSCs (Figure S2C). Among those genes,  
183 *Atp1b1* expression was particularly striking since *Atp1b1* encodes a subunit of Na<sup>+</sup>/K<sup>+</sup> ATPase pump,  
184 and its expression was comparable to BCs where it is essential for blastocoel formation and proper tight  
185 junctions of trophoblast cells (Hamatani et al., 2004; Madan et al., 2007). Thus, *Atp1b1* expression may  
186 be consistent with formation of a blastocoel-like fluid-filled cavity and outer layer cell tight junctions in  
187 iBCs.

188 Genes that are involved in the outer cell lineage induction and/or function (e.g., *Cdx2*, *Gata3*, and  
189 *Krt8* (Troma-I)) were also strongly induced in iBCs (Figure 3A). *Cdx2* was not equally expressed to BCs,  
190 but *Gata3* and *Krt8* were comparable. These data, with the morphology of iBC outer layer cells, suggest  
191 that a functional TE lineage may be established. In contrast, master pluripotent transcription factors  
192 *Nanog* and *Pou5f1* (*Oct4*) were lower in iBCs than in BCs and mEpiSCs, but still detected in many iBCs  
193 (Figure 3A, Figure S2C). *Sox2* was only detected in the *Zscan4*<sup>+</sup> iBC (Figure S2C). Furthermore, we rarely  
194 observed XGFP<sup>+</sup> cells in iBCs (data not shown). These expressions of the pluripotency genes and XGFP  
195 are different from those in naive conversion hemispheres on the plate where XGFP<sup>+</sup> cells expressed  
196 pluripotency genes similar to other PSCs. However, even during the naive conversion, *Nanog* is once  
197 downregulated but quickly recovers to the same level as in PSCs, dependent on LIF signaling (Kime et al  
198 2016). Thus, early pluripotency may be induced but is not activated strongly during iBC induction.

199 Low-level expression of *Cdx2* and *Oct4* mRNA raised the question of whether iBCs correctly possess  
200 the TE lineage outer and ICM inner cell populations and are organized like BCs. To address this, we  
201 examined detection and localization of CDX2 and OCT4, along with YAP and the TE marker TROMA-I  
202 (KRT8), in early iBCs and early BCs by staining with well-characterized antibodies. The iBC inner cells  
203 downregulated CDX2 and YAP similar to BCs, but CDX2 in iBC outer cells was evenly localized and was  
204 not enriched in many nuclei (Figure 3B). These results suggest that expression and phosphorylation of  
205 CDX2 in iBCs are poorly regulated (Rings et al., 2001). Immunostaining iBCs with TROMA-I antibody  
206 revealed that outer layer TE-like flat cells are strongly positive for TROMA-I, similar to BCs (Figure 3C).  
207 Additionally, the inner cell region of the iBCs did not exhibit strong TROMA-I signals, similar to BCs,  
208 which suggested that the inner cells are not in the TE lineage. Conversely, immunostaining iBCs with  
209 OCT4 antibody clearly showed nuclear OCT4 in the inner cell region (Figure 3C; Bulut-Karslioglu et al.,

210 2016; Ralston and Rossant, 2008). Like BCs, The nuclear signals of iBC inner cells were stronger than  
211 those in the outer layer flat cells, although iBCs have a weaker overall OCT4 signal than BCs. To  
212 investigate these differences further, we used two mainstream confocal microscopes to prepare four  
213 early iBC images as control settings to compare with early BCs. The detector gains required for a  
214 comparable image capture suggested that the strong TROMA-I signals in the outer layer cells are  
215 consistent with higher expression levels of Troma-I (Krt8) mRNA in iBCs. However, between iBCs and  
216 BCs, the detector gain difference for OCT4 signal was less than that of Pou5f1 (Oct4) mRNA, suggesting  
217 post-transcriptional regulation of Oct4 (Figure 3A,C, Figure S2C, Table S2).

218 At last, to examine Oct4 function as a transcription factor, we used the *EOS-S(4+)* synthetic live  
219 pluripotency reporter from the Sox2 genetic element *Srr2* to drive a red fluorescent protein (RFP,  
220 *EOS::RFP*). *Srr2* elements require a heterodimer of pluripotency transcription factors OCT4 and SOX2 to  
221 activate (Hotta et al., 2009; Tomioka et al., 2002). We introduced the reporter construct into mEpiSCs  
222 and established recombinant *EOS::RFP* mEpiSCs (Figure 3D). As expected, mEpiSCs were strongly  
223 *EOS::RFP* positive, and the RFP was not detected in differentiated cells, as reported (Figure 3D, Figure  
224 S2E; Hotta et al 2009; Tomioka et al 2002). We generated iBCs from *EOS::RFP* mEpiSCs, and the resulting  
225 iBCs often exhibited RFP signals (Figure 3D). Importantly, the RFP signals were stronger in the putative  
226 ICM than outer cells, suggesting OCT4 and SOX2 in the inner cell regions of iBCs better activate or  
227 maintain *EOS::RFP* expression. Yields from three iBC production wells were 14, 20, and 27 iBCs, and  
228 among those iBCs, 12, 13, and 20 had detectable *EOS::RFP+* (Figure S2F). These data suggest iBCs have  
229 an ICM-like region where some pluripotency transcription network is operative.

230 Thus, iBC-PCs and iBCs exhibit several unique features that are common with preimplantation  
231 embryos at morphological and molecular levels. We concluded that the stepwise manipulation of  
232 signaling pathways triggered, to some extent, a dynamic self-organizing event reminiscent of the first  
233 polarization, differentiation, and morphogenesis of early embryonic development.

### 234 **Reproducibility of iBC Generation**

235 Our various XGFP mEpiSC reporter sub-lines performed similarly throughout iBC induction. Two  
236 published mEpiSC lines reacted similarly throughout and produced iBCs with lower yields (Figure S2G;  
237 Tesar et al., 2007; Ohtsuka et al., 2012). Another mEpiSC line with apparent cell culture characteristic  
238 differences failed completely (Parchem et al., 2014). Therefore, iBC generation should be possible with  
239 many but not all mEpiSC lines.

### 240 **Purified iBCs Implant, Induce Decidualization, and Grow in Pseudopregnant Mice**

#### 241 *Implantation/Decidualization Rates of iBCs*

242 The characteristic similarities between iBCs and BCs led us to examine implantation-competence and  
243 developmental potency of iBCs *in-utero*. We collected iBC-PCs at Day 6 or 7 of induction and allowed  
244 them about 18 hours to expand toward iBCs that were purified with an embryo pipette by visual  
245 assessment and loosely pooled. Purified iBCs were transferred to the uterus horn of sterile-male bred  
246 pseudopregnant mice, and positive control BCs were transferred separately; we also transferred large  
247 mEpiSC colony clusters and embryoid bodies (EBs) prepared from mEpiSCs as controls. We dissected the  
248 transplanted mice between E5.5 and E7.5 and found that transferring iBCs induced deciduae in the  
249 pseudopregnant mice while mEpiSC clusters and EBs failed (Figure 4A,B). Deciduae induced by iBC

250 transfer were similar in focal morphology to BC-induced deciduae although they were, on average,  
251 smaller in size than those from BC transfers. Importantly, many iBC-induced deciduae recruited large  
252 maternal blood vessels seen in the uterus, and sectioning showed red brown color in the decidua basalis  
253 region, similar to those from BCs, indicating significant blood supply from the mother (Figure 4B). These  
254 observations clearly show that iBCs induce decidualization of the uterus and recruit the maternal blood  
255 supply, which result from iBC implantation. Still, the smaller sized deciduae from iBCs suggested post-  
256 implantation developmental delay or resorption.

257 By counting transferred iBCs or BCs and the resulting deciduae obtained, we calculated frequencies  
258 of decidualization (Table S3). iBCs and BCs induced deciduae at 6.7% (10/149) and 69.2% (36/52),  
259 respectively (Figure 4A). Thus, iBCs alone induce decidualization but less frequently than BCs. The lower  
260 frequency by iBCs may be due to different iBC developmental size and timing among a heterogeneity in  
261 quality (Figure 2, Figure 3, Figure S2).

262 Co-transferring control embryos that easily implant improves implantation rates of difficult embryos  
263 in assisted reproductive settings (Mochida et al., 2014). We therefore transferred iBCs in co-transfer  
264 with control BCs (Figure 4C). In total, we transferred 186 iBCs along with 109 BCs to numerous uteri, and  
265 upon dissection, we frequently observed more deciduae than the number of control BCs, implicating  
266 iBCs as the source of increased implantation. Among *all* co-transfer experiments, the total number of  
267 116 observed deciduae divided by the total number of 109 control BCs would mean an impossible  
268 implantation rate of 106.4% (116/109) if control BCs were the only source (Figure 4C, Table S3). We note  
269 that, since control BCs transferred alone implanted at 69.2% (Figure 4A) and others reported control BC  
270 implantation rates of 43-44% (Bulut-Karslioglu et al., 2016), iBCs should be the source of the 37.2%  
271 difference, or increase the implantation of control BCs, or a combination therein (Figure 4C). Yet even if  
272 we assumed 100% success from all BCs, we performed 26 total iBC+BC co-transfer experiments, and 15  
273 of those experiments (57.7%) induced more focal deciduae than the number of BCs (Table S3). Given  
274 that co-transfer is more robust, we also examined co-transfer of mEpiSC clusters or EBs from mEpiSCs  
275 along with BCs. We found no deciduae from the EB+BC co-transfers, meaning the size or cells of EBs  
276 might impair the implantation process (Figure 4C). mEpiSC clusters with BCs proved to be a better  
277 control co-transfer experiment, allowing for the likely 68.8% implantation of control BCs similar to  
278 control BCs alone (Figure 4A,C).

279 iBC implantation and decidualization in co-transfer with BC are higher than as a single source. To  
280 confirm the origin of the deciduae from both types of experiments, we obtained genomic DNA from  
281 some deciduae cryosections by laser capture microdissection (LCM) and amplified a transgenic DNA  
282 region specific to cells that generate iBCs (Figure 4D, Figure S2D, Figure S4A). This analysis confirmed  
283 that iBCs from both the single source and co-transfer experiments induced deciduae with detectable  
284 tissue at the proper location for natural embryos (Figure 4B). We therefore recognize that co-  
285 transferring BCs with iBCs enhances the ability of iBCs to induce decidualization and may prove more  
286 useful in later studies.

### 287 *Cryosection and Analysis of Implanted iBC-Derived Tissues*

288 We performed hematoxylin and eosin (H&E) staining and immunohistochemistry (IHC) on cryosections  
289 of dissected deciduae from E7.5 iBC single source transfer experiments and compared them to control  
290 embryos at E7.5 and E6.5 (Figure 5, Figure S4B). Similar to control deciduae, iBC-induced deciduae were



291 surrounded by uterine tissue and had distinct sub-regions; among those, the decidua basalis showed  
292 vascular sinus foldings and red blood cells, indicating maternal blood supply (Figure 5, Figure S3, Figure  
293 S4A,B). Sections often showed distinct disfigured tissues in the presumptive embryonic region with  
294 surrounding ExEm-like cells and internal small dark stained cells resembling the embryonic portion  
295 (Figure 5A,C, Figure S3, Figure S4A). We tested proximal cryosections of the same deciduae for ExEm  
296 lineage TROMA-I and found that the surrounding iBC-derived ExEm-like tissues were TROMA-I+ and had  
297 invaded the deciduae, growing to a total size similar to or in excess of a control E6.5 embryo (Figure 5B).  
298 The cryosections showed tissues resembling a retracting parietal yolk sac cavity, a degrading putative  
299 Reichert's membrane, and TROMA-I+ cells surrounding internal TROMA-I- cells that we speculated to be  
300 Em portion cells based on location and H&E stain characteristics (Figure 5, Figure S3, Figure S4A). While  
301 iBC-derived E7.5 tissues were larger than E6.5 control embryo tissues, many cells appeared pycnotic and  
302 lacked a healthy appearance, and were collectively smaller than a E7.5 control embryo (Figure 4B;  
303 Gardner and Johnson, 1972).

304 To further examine the development of iBC-derived ExEm tissues in implanted deciduae, we  
305 performed IHC for ExEm markers trophoblast-specific protein alpha (TPBPA) and placental lactogen 1  
306 (PL-I). TPBPA is expressed in ectoplacental cone, spongiotrophoblasts and precursors of trophoblast  
307 giant cells (TGCs) that originate from TE (Simmons and Cross, 2005; Simmons et al., 2007). TPBPA was  
308 detected in the larger cells surrounding the embryonic cavity in both iBC and BC-implanted deciduae at  
309 E6.5 (Figure S4C). At the same time, PL-I expressing cells characteristic of parietal TGCs lined the  
310 embryonic cavity in iBC deciduae similar to the control embryo where it was also detected on the  
311 visceral endoderm (Figure S4C; Chen et al., 2016; Peng et al., 2015; Simmons and Cross, 2005; Simmons  
312 et al., 2007; Screen et al., 2008). Some TPBPA+ or PL-I+ cells had larger more brightly stained nuclei and  
313 scattered far from the cavity, suggesting they are polyploid scattering TGCs (Figure S4C).

#### 314 *Implanted iBCs May Develop Briefly Before Resorption*

315 We noticed that iBC-implanted deciduae were often variably smaller than control deciduae of the same  
316 timing. Histology frequently showed evidence of a retracting post-implantation embryonic cavity (Figure  
317 5A,C, Figure S4). We observed blood cells within the blood sinuses and around the iBC-derived  
318 implanted tissues (Figure S3), but the high presence of lymphoid and myeloid cells around the disfigured  
319 pycnotic tissues indicated the embryo resorption process (Figure 5C, Figure S3; Cossée et al., 2000;  
320 Flores et al., 2014). Still, upon closer observation, iBC-derived non-decidual tissues were markedly  
321 diverse and had morphology and localization similar to invading trophoblasts, ectoplacental cone, ExEm  
322 portion, Em portion, and yolk sac cavity, when compared to a previous report of natural resorbing  
323 embryos (Figure 4, Figure S3; Cossée et al., 2000).

324  
325 These data show that some iBCs are functionally competent to implant, induce decidualization, and  
326 grow to greater cell numbers while developing over several days. Implanted iBC tissues displayed varied  
327 natural analogous characteristics while providing distinct evidence of ExEm tissue differentiation  
328 surrounding internal cells resembling the Em lineage, and in total, apparently following a natural  
329 progression of embryonic resorption.

### 330 **Further Characterization of the iBC Generation Process**

#### 331 *Establishing Pluripotency Is Insufficient in iBCs, Yet Possible in Outgrowths*

332 Mouse embryonic stem (ES) cells are a naive PSC-derived from the ICM of BCs. In addition, trophoblast  
333 stem (TS) cells can be established from BCs using different conditions. To determine if ES-like or TS-like  
334 cells could be derived from iBCs, we isolated iBCs/iBC-PCs with XGFP and *EOS::D2nRFP* dual reporters  
335 and plated them on feeder cells.

336 In ES cell derivation conditions (Czechanski et al., 2014), outgrowths proliferated, and some cells  
337 expressed XGFP and *EOS::D2nRFP* (Figure S5A). These cells could be passaged and enriched like naive ES  
338 cells and were comparable to naive ES cells when stained for OCT4, NANOG, and YAP (Figure 6A). We  
339 also examined expression of several important pluripotency and early embryonic genes with RT-qPCR  
340 and found that iBC/iBC-PC derived cells were generally comparable to ES cells (Figure 6B). Interestingly,  
341 iBC/iBC-PC-derived cells expressed notably higher levels of *Zscan4* and *Zfp42* (Rex1).

342 We asked if iBCs/iBC-PCs give rise to TE lineage progeny on feeder cells and first saw colonies of  
343 slow growing TE-like cells expressing CDX2 (Figure 6C). We also tried a defined TS cell medium to derive  
344 TS cells or their progeny (Latos and Hemberger, 2016; Ohinata and Tsukiyama, 2014), but we could not  
345 obtain stable TS cells. However, we could expand TE-like cells for a few passages in the defined  
346 condition (Figure S5B), and those cells passed through a binucleate phase that is characteristic of TE-  
347 derivative cell cultures that produce trophoblast giant cells (Figure S5B, mid panel; Ilgren, 1981). The  
348 culture of cells slowed almost to a halt of large single and binucleate cells that stained strongly but  
349 variably for the TE-lineage markers PL-I and TPBPA (Figure S5B; Awonuga et al., 2011).

350 These outgrowth results suggest that iBCs/iBC-PCs hold increased potential whereby additional  
351 culture time might fully establish naive pluripotency. In addition, our TS cell culture outgrowth did not  
352 establish stabilized TS cells, but yielded cells with important post-implantation ExEm markers and  
353 characteristics *in-vitro* to strengthen our cryosection IHC detection of iBC-derived implanted tissues  
354 (Figure S4C).

355  
356 *iBC Induction Requires Prdm14 and May Concomitantly Activate a Totipotency-Related Cell Program*  
357 Because iBCs coordinately differentiated evidence of a bi-directional 3D cyst expressing cleavage stage-  
358 initiated genes, such as *Atp1b1*, and possibly had interim loss of pluripotency, we hypothesized that iBCs  
359 emerge from totipotent-like cells. The totipotent genome is prepared in the germ line and activated by  
360 ZGA as the zygote enters 2C and cleavage. Phase 1 of iBC induction has defined molecules involved in  
361 germ cell differentiation (Chen et al., 2012; Hikabe et al., 2016; Yamaji et al., 2008; Yang et al., 2017),  
362 and Phase 2 has defined molecules that induce naive pluripotency and TE lineage transdifferentiation  
363 (Figure 2A; Bao et al., 2009; Hayashi et al., 2010; Kime et al., 2016). In this sense, we looked to *Prdm14*,  
364 a major gene regulatory factor shared in the germ line and early embryo (Nakaki and Saitou, 2014;  
365 Hackett et al., 2017). RT-qPCR of mEpiSCs showed very low detection of *Prdm14* in large samples, and  
366 *Prdm14* was undetectable in small isolated colonies; however, in experiments for isolated BC and iBC  
367 samples, some iBCs expressed *Prdm14* at significant or comparable levels to BCs (Figure 7A), suggesting  
368 that this important transcription factor is induced in the iBC process.

369 We tested our constitutive shRNA *Prdm14* knockdown(KD) mEpiSCs and found with daily microscopy  
370 that the experiment began similar to control cells and initiated the compacted iBC-PC/iBC originating  
371 loci (Figure 7B). However, by Day 6, the iBC-PCs that may become iBCs were nearly completely aborted,  
372 and the peripheral cells appear to degrade (Figure 7B). Supernatants collected from all iBC experiments

373 with *Prdm14* KD cells failed to yield favorable iBCs and had increased cell debris. For reference, when  
374 control cell iBC-PC were not harvested by agitation to supernatant on Day 6, they still differentiated as  
375 gently attached expanded iBC above such concentrated cell loci (Figure 3D, Figure 7G).

376 To examine *Prdm14* expression in control and *Prdm14* KD cells, we collected mRNA from cell  
377 populations at the end of Phase 1 on Day 4, when the cultures appear to perform similarly, and on Day  
378 6, immediately before iBC-PCs are usually harvested or lost in the *Prdm14* KD cell population (Figure 7B).  
379 Compared to the detection of *Gapdh*, control cell iBC induction populations had notable *Prdm14*  
380 expression by Day 4, and further increased by Day 6. *Prdm14* KD cells showed significantly reduced  
381 *Prdm14* expression on Day 4 and a much lower proportional expression by Day 6 (Figure 7C). The lower  
382 detection of *Prdm14* in *Prdm14* KD cells on Day 6 suggests that the lost iBC-PCs required *Prdm14* and  
383 that iBC-PC might represent most of the detectable *Prdm14* at that time (Figure 7B,C).

384 To further elucidate a possible relationship between totipotency and iBC generation, we cloned the  
385 well-studied 2C *MERVL* live totipotency-related reporter to drive an RFP(*MERVL::RFP*) in XGFP mEpiSCs  
386 to operate dual reporters (Figure S2D). These reporters were undetectable in mEpiSCs in agreement  
387 with previous reports (Bao et al., 2009; Macfarlan et al., 2012; Wu et al., 2017). On Days 5-6 of iBC  
388 induction, we observed some of the characteristic loci where iBC-PC originate had *MERVL::RFP*+ cells,  
389 and many cells expressed XGFP, suggesting X chromosome reactivation to Xa/Xa (Figure 7D). We  
390 speculated that cells with dual reporter activation implicates ZGA mechanisms since both are reported  
391 characteristics of 2C cleavage stage cells (Figure 7D; Monk and Harper, 1979; Okamoto et al., 2004, Wu  
392 et al., 2017). Interestingly, when iBC-PC were harvested, some remaining attached *MERVL::RFP*+ cells  
393 variably lost XGFP expression and often became larger and more rounded with cleavage stage-like cell  
394 morphology (Figure 7E). Furthermore, despite the low overall frequency of *MERVL*+ reporter cell loci on  
395 the plate at Day 6, many of the iBC-PCs harvested by agitation were composed of *MERVL::RFP*+ cells  
396 (Figure 7F). *MERVL::RFP* expression in iBC-PC was usually weaker than the *MERVL::RFP*+ cells seen on  
397 the plate (Figure 7D,E,F,G). Also, XGFP was generally not observed in *MERVL::RFP*+ collected iBC-PCs,  
398 suggesting that both reporters were down regulated at that critical stage similar to compacting 8C/16C  
399 embryos that precede BCs. Strengthening this observation, emergent iBCs had far reduced detectable  
400 *MERVL::RFP* (Figure 7G). Of further interest, *MERVL::RFP*+ and *MERVL::RFP*+/*XGFP*+ cells were variably  
401 maintained on the plate for several days in Phase 2 media after iBC-PC harvest.

402 Collectively, our results indicated that the iBC production process required *Prdm14*.  
403 *MERVL::RFP*+/*XGFP*+ subpopulations preceded and reported from the characteristic loci where *Prdm14*  
404 dependent iBC-PC emerged, and many harvested iBC-PCs expressed the *MERVL::RFP* reporter. These  
405 data show an unknown intermediate role for *Prdm14*-dependent iBC formation among plate loci where  
406 totipotent-cell characteristics may be differentially but strongly induced. Since *Prdm14* KD compromised  
407 the entire iBC formation via abortive loss of iBC-PCs, and both the TE-like and putative ICM-like cells  
408 were lost, *Prdm14* may be key to improved induction of totipotent 2C-like cells or the specification of  
409 lineages in iBCs.

## 410 411 **DISCUSSION**

412 This study showed that sequential treatment of mouse PSC culture with defined molecules reproducibly  
413 induces BC-like 3D structures with several distinct features of BCs. Remarkably, the structures emerged  
414 from floating small cell clumps resembling denuded 8C/16C-compact embryos wherein cells lack  
415 morphological differences or polarity. As such, differentiation to the iBC structure is emergent. iBCs  
416 exhibited signs of implantation when transplanted into pseudopregnant surrogates, indicating

417 implantation-competence. In previous work of mouse PSC-derived oogenesis, rare BC-like structures  
418 from 40+ day long-term differentiation experiments were partially described (Hübner et al., 2003).  
419 However, whether those structures were developmentally competent *in-utero* is unknown.  
420 Furthermore, using TS cells, PSCs and PSC-derived bi-directionally contributing cells has never been  
421 demonstrated to contribute to animal development in transplanted pseudopregnant mothers without  
422 donor cells or chimerism for support (Macfarlan et al., 2012; Yang et al., 2017). Therefore, generation of  
423 fully functional iBCs, which give rise to newborn animals in an isogenic setting, may uncover a maximum  
424 differentiation potential of PSCs.

425 To our knowledge, this is the first demonstration that PSC culture can generate the 3D architecture  
426 with cellular materials and implantation-competence resembling BCs. Until now, only implantation-  
427 competent BCs or their trophoblasts (Gardner and Johnson, 1972), chimeras thereof, or specific  
428 melanoma cells were reported to induce deciduae in sterile-male bred pseudopregnant mice (Wilson,  
429 1963). A related field of uterine environment study involves deliberate uterus disruption often  
430 combined with injected progesterone and estrogen hormone treatments to induce deciduomas  
431 (Herington and Bany, 2007; Lee et al., 2007). Deciduomas are composed of homogenous decidual cells,  
432 and focal deciduomas that better resemble individual natural deciduae requires concanavalin A-coated  
433 Sepharose beads (Herington et al., 2009). Unlike deciduomas, our iBC-induced deciduae rely exclusively  
434 on sterile-male bred pseudopregnant surrogates and have correct positional implanted tissues in focal  
435 deciduae that resemble natural deciduae or deciduae from BC-derived trophoblast vesicles (Gardner  
436 and Johnson, 1972). To exclude the possibility of deciduomas, we molecularly characterized iBC-derived  
437 implanted tissues and emphasize that we do not use the materials or methods required to produce  
438 deciduoma. In our experiments, co-transfer with control embryos may greatly improve the implantation  
439 of the iBC, as with difficult mouse strains (Mochida et al., 2014), yet iBC alone demonstrate  
440 implantation-competence.

#### 441 *Molecular Considerations in the iBC Process*

442 We showed that YAP localization implicates non-polarized and polarized iBC-PC, and polarized early  
443 iBCs, that are critically similar to early embryos. Intermediate MERVL reporter and comparable *Zscan4*  
444 activation furthers that prospect. Signaling inputs that we provided during iBC production may mimic  
445 developmental cues of embryogenesis. Using a synthetic LPA (OMPT) in our cocktail may be striking  
446 because LPA treated BCs exhibit enhanced embryogenesis by activating YAP *in-vitro* and *in-utero* (Yu et  
447 al., 2016).

448 iBCs expressed *Cdx2* at a lower level than BCs and had some nuclear CDX2 localization while most  
449 iBC outer cells retained cytosolic CDX2. During early development, *Cdx2* is preferentially upregulated  
450 around the 8C stage to specify committed outer cells (Strumpf et al., 2005; Ralston and Rossant, 2008).  
451 *Cdx2* is crucial for development since *Cdx2*-deficient BCs cannot implant in the uterus despite having  
452 functional pluripotent cells in the ICM (Meissner and Jaenisch, 2006). We found iBCs exhibit a TROMA-I+  
453 and nuclear-enriched YAP outer layer and a blastocoel-like cavity and are implantation-competent.  
454 Additionally, TROMA-I+ cells from transplanted iBCs grew well, invaded the uterus to decidua reaction,  
455 and developed different morphologies and detectable markers (PL-I, TPBPA), depending on their  
456 positions in the embryonic cavity. These results further indicate the proliferation and differentiation  
457 capacity of the iBC outer cells within the TE lineage after implantation despite weak iBC *Cdx2*

458 characteristics. Additionally, post-implantation proliferation of trophoblast progeny depends on ICM-  
459 derived tissues in normal development, which suggests that some of the larger more developed iBC-  
460 derived implanted tissue may have been helped by cells from the iBC ICM-like region (Gardner and  
461 Johnson, 1972, 1975; Rossant and Ofer, 1977; Simmons and Cross, 2005).

462 iBCs plated on feeder cells produced TE-like colonies uniformly expressing CDX2 protein, and when  
463 grown in defined TE cell culture conditions, the iBC/iBC-PC-derived cells were characteristically similar to  
464 dissociated cultured TE derivatives. Thus, Cdx2 expression in iBCs may be sufficient to induce functional  
465 TE lineage cells that enable iBCs to implant and develop for several days. However, we observed that  
466 iBCs had uneven implantation, implicating molecular pathways that interface between the TE-like cells  
467 and receptive uterus are incorrect. Optimizing our regimen based on known conditions that induce  
468 trophoblasts from PSCs may improve Cdx2 expression to correct abnormalities (Hayashi et al., 2010).

469 Our results show that iBCs have a putative ICM with OCT4 and nuclear-excluded YAP and  
470 downregulated both CDX2 and TROMA-I protein. Notably, the exclusion of nuclear YAP is a characteristic  
471 of pluripotent cells in the ICM of BCs that is critically different from *in-vitro* cultured mouse pluripotent  
472 ES cells that have nuclear-enriched YAP (Tamm et al., 2011; Figure 6A). We speculate that the putative  
473 ICM in iBCs became the central TROMA-I- cells we observed in iBC-derived cryosections. However, the  
474 key pluripotent transcription factor Oct4 mRNA was expressed at lower levels in iBCs than in BCs. Since  
475 precise expression of Oct4 is crucial for establishing and/or maintaining pluripotency, lower expression  
476 suggests suboptimal re-establishment of pluripotency in iBCs (Niwa et al., 2000). This may explain why  
477 iBC-derived post-implantation proliferation and development eventually delayed or ceased (Gardner  
478 and Johnson, 1972). Additionally, we rarely observed Xi-GFP reactivation in iBCs, consistent with the  
479 lower expression of *Nanog* (Silva et al., 2009). However, we could establish ES cell-like cells from  
480 iBCs/iBC-PCs in naive PSC derivation conditions, suggesting that authentic pluripotency could be  
481 reestablished in altered conditions. We therefore speculate that minor critical adjustments to iBC  
482 generation conditions may improve intermediate iBC-PC and iBC cell states.

483 The findings of the insufficient pluripotency in iBCs are in stark contrast to what we observed during  
484 the hemisphere formation experiments where naive pluripotency was robustly established (Kime et al.,  
485 2016). In that study, we showed that BMP4 signaling, with LIF and ascorbic acid, greatly increased  
486 *Prdm14* expression during conversion of mEpiSCs to the naive state (Kime et al., 2016); but we also  
487 measured the induction of *Prdm1*(Blimp1) and *Id* gene family mRNAs, which we reported here.  
488 SMAD2/3 signaling inhibition stimulates BMP induction, and BMP4 can replace serum in naive PSC  
489 culture by inducing *Id* genes toward self-renewal (Ying et al., 2003). BMP signaling and these critical  
490 *Prdm* and *Id* family genes are shared among germ cell development and cleavage through pre-  
491 implantation embryonic development (Yang et al., 2017; Hiller et al., 2010; Yamaji et al., 2008).  
492 Interestingly, *Id2* is comparably expressed in outer and inner lineage early embryonic cells (Ying et al.,  
493 2003; Tang et al., 2010; Wu et al., 2016). One considerable difference between our hemisphere/naive  
494 conversion and iBC generation is in the induction regimes. SMAD2/3 signaling inhibition may be  
495 necessary to generate iBCs, but SMAD2 specific inhibition induces TE and germ cell differentiation while  
496 suppressing pluripotency expression via *Nanog* inhibition (Chen et al., 2012; Sakaki-Yumoto et al., 2013).  
497 We anticipate that SMAD2/3 signaling inhibition may require further adjustment to achieve sufficient  
498 pluripotency in iBCs and note that a necessary adjustment of SB431542 concentration was mEpiSC line  
499 specific.

500 *Prdm14* KD experiments suggest that *Prdm14* has a pivotal role during iBC induction although the  
501 exact mechanisms are unknown. In the iBC system, *Prdm14* was greatly enriched by Day 4, prior to LIF in  
502 Phase 2, which contrasts with conventional roles of LIF in ES cell pluripotency (Ying et al., 2003). Taken  
503 together with SMAD2/3 signaling inhibition, early increases of *Prdm14* observed in iBC generation may  
504 be partial to germ cell induction mechanisms. *Prdm14* is a transcription factor whose role is both  
505 powerful and unclear: reported to be dispensable in BCs yet a major epigenetic regulator expressed in  
506 the 2C cleavage stage that may direct lineage commitment in the BC (Yamaji et al., 2008; Luna-Zurita  
507 and Bruneau, 2013; Burton et al., 2013). *Prdm14* is involved in dynamic biological events that  
508 accompany epigenetic reprogramming, such as PGC specification, X chromosome reactivation, and  
509 conversion from primed to naive state pluripotency (Yamaji et al., 2008; Gillich et al., 2012; Payer et al.,  
510 2013; Kime et al., 2016). Intriguingly, iBC induction with *Prdm14* KD cells proceeded typically for several  
511 days but caused iBC-PC cell death at the time when iBC-PCs should begin to polarize and differentiate to  
512 iBCs. How *Prdm14* is involved in iBC production warrants further investigation.

513 Notably, our defined conditions resemble germ cell induction medium, suggesting a PGC/germ cell  
514 specification process may be involved; the germ line prepares a totipotent genome that is not yet  
515 activated epigenetically. Since BCs naturally differentiate from homogenous totipotent cells, the 2C  
516 stage ZGA mechanism suggested by *MERVL* may also play a role (Wu et al., 2017). Supporting this  
517 notion, we observed the compacting iBC-PC/iBC originating loci with concomitant *MERVL::RFP+* cells  
518 curiously demonstrating large cleavage-stage cell size and morphology. Some previous studies of  
519 *MERVL*-enriched PSCs touched upon the implication of totipotent hallmarks, ZGA, and 2C-like  
520 expression, yet these reports did not demonstrate similar apparent morphological changes (Macfarlan  
521 et al., 2012; Blaschke et al., 2013; Ishiuchi et al., 2015). Several reports found ES cell colonies have rare  
522 transient *MERVL+* cells that return to the ES state. In iBC experiments, we see several cells at iBC-PC loci,  
523 or iBC-PC, activating *MERVL::RFP* simultaneously and with relatively consistent sustained expression.  
524 We also note that X reactivation suggested by *XGFP+* cells among our *MERVL::RFP+* cells presents a ratio  
525 quite different from distinct features of naive PSCs, which should be completely *Xa/Xa* and have rare  
526 *MERVL* reporter activation (Macfarlan et al., 2012; Payer et al., 2011). Our observation of *MERVL::RFP+*  
527 cells with less X reactivation may reflect the varied *Xa/Xa* state of cleavage stage cells rather than naive  
528 PSCs. The enrichment of *Atp1b1* in isolated iBCs was also remarkable since natural embryos activate  
529 *Atp1b1* in cleavage stage cells in preparation to act in cell junctions of compaction and as a  $\text{Na}^+/\text{K}^+$   
530 ATPase pump subunit to fill the blastocoel (Hamatani et al., 2004; Madan et al., 2007; Stephenson et al.,  
531 2010). Isolated iBCs could also show *Zfp42* (*Rex1*) and *Zscan4*, which are also cleavage stage-induced  
532 genes with different roles in pluripotent cells. Moreover, *Zfp42* (*Rex1*) may negatively regulate 2C-  
533 related gene expression (Schoorlemmer et al., 2014), yet iBC/iBC-PC-derived ES-like cells have notably  
534 increased expression of both *Zfp42* (*Rex1*) and *Zscan4* RNAs when compared to ES cells. With these  
535 observations, a thorough molecular elucidation of iBC generation would likely improve their quality to  
536 obtain full functionality.

537 Generation of iBCs requires stringent PSC preparation and rounds of iBC purification, yet most of the  
538 experiment involves 1 week of simplified defined-media changes. Thus, we envision that iBC technology  
539 readily opens avenues in several fields, such as embryology and implantation biology among its promise  
540 in early embryogenesis. For instance, even though iBCs cannot develop completely, transplanting iBCs  
541 from gene knockdown or knockout PSCs may make it easier to elucidate the molecular mechanisms

542 governing implantation. In any case, our findings may offer a new step in expanding knowledge in  
543 pluripotency, totipotency, and embryogenesis, which may be necessary to significantly advancing PSC  
544 technologies and related fields.

545

#### 546 **AUTHOR CONTRIBUTIONS**

547 Conceptualization, C.K.; Methodology, C.K. and K.T.; Validation, S.O.; Formal Analysis, C.K. and K.T.;  
548 Investigation, C.K., K.T., and H.K.; Resources, C.K., K.T., S.Y., and M.T.; Writing – Original Draft, C.K. and  
549 K.T.; Writing – Review & Editing, C.K. and K.T.; Visualization, C.K.; Supervision, C.K. and K.T.; Project  
550 Administration, C.K.; Funding Acquisition, S.Y., M.A., and M.T.

551

#### 552 **ACKNOWLEDGEMENTS**

553 We honor the help of Dr. Hitoshi Niwa for critical input and for providing the Rabbit anti-Mouse CDX2  
554 antibody. We are grateful to Drs. Siqin Bao and Azim Surani for their female XGFP mEpiSC. We also  
555 thank Drs. Robert Blelloch and Paul Tesar for providing their mEpiSC for research.

556 MERVL 2C and EOS-S(4+) reporter DNA was provided by Addgene (<http://www.addgene.org>) under MTA  
557 and subcloned into our systems. TROMA-I (Krt8) monoclonal antibody developed by Institut Pasteur was  
558 obtained from the Developmental Studies Hybridoma Bank(DSHB), created by the NICHD of the NIH and  
559 maintained at The University of Iowa, Department of Biology, Iowa City, IA 52242.

560 We greatly thank the Yamanaka and Takahashi labs for the support and research environment that  
561 made this work possible.

562

#### 563 *Conflict of Interest*

564 C.K and K.T. have applied for patents related to this technology and extended works. S.Y. is a scientific  
565 advisor of iPS Academia Japan without salary.

566

567 **REFERENCES**

- 568 Abe, T., Kiyonari, H., Shioi, G., Inoue, K.-I., Nakao, K., Aizawa, S., and Fujimori, T. (2011). Establishment of  
569 conditional reporter mouse lines at ROSA26 locus for live cell imaging. *Genesis* 49, 579–590.
- 570 Akiyama, T., Xin, L., Oda, M., Sharov, A.A., Amano, M., Piao, Y., Cadet, J.S., Dudekula, D.B., Qian, Y.,  
571 Wang, W., et al. (2015). Transient bursts of Zscan4 expression are accompanied by the rapid  
572 derepression of heterochromatin in mouse embryonic stem cells. *DNA Res* 22, 307–318.
- 573 Awonuga, A. o., Zhong, W., Abdallah, M. e., Slater, J. a., Zhou, S. c., Xie, Y. f., Puscheck, E. e., and  
574 Rappolee, D. a. (2011). Eomesodermin, HAND1, and CSH1 proteins are induced by cellular stress in a  
575 stress-activated protein kinase-dependent manner. *Mol. Reprod. Dev.* 78, 519–528.
- 576 Bao, S., Tang, F., Li, X., Hayashi, K., Gillich, A., Lao, K., and Surani, M.A. (2009). Epigenetic reversion of  
577 post-implantation epiblast to pluripotent embryonic stem cells. *Nature* 461, 1292–1295.
- 578 Bedzhov, I., Graham, S.J.L., Leung, C.Y., and Zernicka-Goetz, M. (2014). Developmental plasticity, cell  
579 fate specification and morphogenesis in the early mouse embryo. *Phil. Trans. R. Soc. B* 369, 20130538.
- 580 Blaschke, K., Ebata, K.T., Karimi, M.M., Zepeda-Martínez, J.A., Goyal, P., Mahapatra, S., Tam, A., Laird,  
581 D.J., Hirst, M., Rao, A., et al. (2013). Vitamin C induces Tet-dependent DNA demethylation and a  
582 blastocyst-like state in ES cells. *Nature* 500, 222–226.
- 583 Bulut-Karslioglu, A., Biechele, S., Jin, H., Macrae, T.A., Hejna, M., Gertsenstein, M., Song, J.S., and  
584 Ramalho-Santos, M. (2016). Inhibition of mTOR induces a paused pluripotent state. *Nature* 540, 119–  
585 123.
- 586 Burton, A., Muller, J., Tu, S., Padilla-Longoria, P., Guccione, E., and Torres-Padilla, M.-E. (2013). Single-  
587 Cell Profiling of Epigenetic Modifiers Identifies PRDM14 as an Inducer of Cell Fate in the Mammalian  
588 Embryo. *Cell Reports* 5, 687–701.
- 589 Cha, J., Sun, X., and Dey, S.K. (2012). Mechanisms of implantation: strategies for successful pregnancy.  
590 *Nat Med* 18, 1754–1767.
- 591 Chen, C.-Y., Chan, C.-H., Chen, C.-M., Tsai, Y.-S., Tsai, T.-Y., Wu Lee, Y.-H., and You, L.-R. (2016). Targeted  
592 inactivation of murine Ddx3x: essential roles of Ddx3x in placentation and embryogenesis. *Hum Mol*  
593 *Genet* 25, 2905–2922.
- 594 Chen, W., Jia, W., Wang, K., Zhou, Q., Leng, Y., Duan, T., and Kang, J. (2012). Retinoic acid regulates germ  
595 cell differentiation in mouse embryonic stem cells through a Smad-dependent pathway. *Biochemical*  
596 *and Biophysical Research Communications* 418, 571–577.
- 597 Cossée, M., Puccio, H., Gansmuller, A., Koutnikova, H., Dierich, A., LeMeur, M., Fischbeck, K., Dollé, P.,  
598 and Koenig, M. (2000). Inactivation of the Friedreich ataxia mouse gene leads to early embryonic  
599 lethality without iron accumulation. *Hum. Mol. Genet.* 9, 1219–1226.



- 600 Czechanski, A., Byers, C., Greenstein, I., Schrode, N., Donahue, L.R., Hadjantonakis, A.-K., and Reinholdt,  
601 L.G. (2014). Derivation and characterization of mouse embryonic stem cells from permissive and  
602 nonpermissive strains. *Nature Protocols* 9, 559–574.
- 603 Flores, L.E., Hildebrandt, T.B., Kühl, A.A., and Drews, B. (2014). Early detection and staging of  
604 spontaneous embryo resorption by ultrasound biomicroscopy in murine pregnancy. *Reproductive*  
605 *Biology and Endocrinology* 12:1, 1-24.
- 606 Gillich, A., Bao, S., Grabole, N., Hayashi, K., Trotter, M.W.B., Pasque, V., Magnúsdóttir, E., and Surani,  
607 M.A. (2012). Epiblast Stem Cell-Based System Reveals Reprogramming Synergy of Germline Factors. *Cell*  
608 *Stem Cell* 10, 425–439.
- 609 Gardner, R.L., and Johnson, M.H. (1972). An investigation of inner cell mass and trophoblast tissues  
610 following their isolation from the mouse blastocyst. *Development* 28, 279–312.
- 611 Gardner, R.L., and Johnson, M.H. (1975). Investigation of cellular interaction and deployment in the early  
612 mammalian embryo using interspecific chimaeras between the rat and mouse. *Ciba Found. Symp.* 0,  
613 183–200.
- 614 Hackett, J.A., Kobayashi, T., Dietmann, S., and Surani, M.A. (2017). Activation of Lineage Regulators and  
615 Transposable Elements across a Pluripotent Spectrum. *Stem Cell Reports* 8, 1645–1658.
- 616 Hamatani, T., Carter, M.G., Sharov, A.A., and Ko, M.S.H. (2004). Dynamics of Global Gene Expression  
617 Changes during Mouse Preimplantation Development. *Developmental Cell* 6, 117–131.
- 618 Hayashi, Y., Furue, M.K., Tanaka, S., Hirose, M., Wakisaka, N., Danno, H., Ohnuma, K., Oeda, S., Aihara,  
619 Y., Shiota, K., et al. (2010). BMP4 induction of trophoblast from mouse embryonic stem cells in defined  
620 culture conditions on laminin. *In Vitro Cell Dev Biol Anim* 46, 416–430.
- 621 Herington, J.L., and Bany, B.M. (2007). Effect of the Conceptus on Uterine Natural Killer Cell Numbers  
622 and Function in the Mouse Uterus During Decidualization. *Biol Reprod* 76, 579–588.
- 623 Herington, J.L., Underwood, T., McConaha, M., and Bany, B.M. (2009). Paracrine Signals from the Mouse  
624 Conceptus Are Not Required for the Normal Progression of Decidualization. *Endocrinology* 150, 4404–  
625 4413.
- 626 Hikabe, O., Hamazaki, N., Nagamatsu, G., Obata, Y., Hirao, Y., Hamada, N., Shimamoto, S., Imamura, T.,  
627 Nakashima, K., Saitou, M., et al. (2016). Reconstitution in vitro of the entire cycle of the mouse female  
628 germ line. *Nature* 539, 299–303.
- 629 Hirate, Y., Hirahara, S., Inoue, K., Kiyonari, H., Niwa, H., and Sasaki, H. (2015). Par-aPKC-dependent and -  
630 independent mechanisms cooperatively control cell polarity, Hippo signaling, and cell positioning in 16-  
631 cell stage mouse embryos. *Develop. Growth Differ.* 57, 544–556.
- 632 Hiller, M., Liu, C., Blumenthal, P.D., Gearhart, J.D., and Kerr, C.L. (2010). Bone Morphogenetic Protein 4  
633 Mediates Human Embryonic Germ Cell Derivation. *Stem Cells and Development* 20, 351–361.

- 634 Hotta, A., Cheung, A.Y.L., Farra, N., Vijayaragavan, K., Séguin, C.A., Draper, J.S., Pasceri, P., Maksakova,  
635 I.A., Mager, D.L., Rossant, J., et al. (2009). Isolation of human iPS cells using EOS lentiviral vectors to  
636 select for pluripotency. *Nat Meth* 6, 370–376.
- 637 Hübner, K., Fuhrmann, G., Christenson, L.K., Kehler, J., Reinbold, R., Fuente, R.D.L., Wood, J., Strauss,  
638 J.F., Boiani, M., and Schöler, H.R. (2003). Derivation of Oocytes from Mouse Embryonic Stem Cells.  
639 *Science* 300, 1251–1256.
- 640 Ilgren, E.B. (1981). The initiation and control of trophoblastic growth in the mouse: Binucleation and  
641 polyploidy. *Placenta* 2, 317–331.
- 642 Ishiuchi, T., Enriquez-Gasca, R., Mizutani, E., Bošković, A., Ziegler-Birling, C., Rodriguez-Terrones, D.,  
643 Wakayama, T., Vaquerizas, J.M., and Torres-Padilla, M.-E. (2015). Early embryonic-like cells are induced  
644 by downregulating replication-dependent chromatin assembly. *Nat Struct Mol Biol* 22, 662-671.
- 645 Kime, C., Sakaki-Yumoto, M., Goodrich, L., Hayashi, Y., Sami, S., Derynck, R., Asahi, M., Panning, B.,  
646 Yamanaka, S., and Tomoda, K. (2016). Autotaxin-mediated lipid signaling intersects with LIF and BMP  
647 signaling to promote the naive pluripotency transcription factor program. *PNAS* 113, 12478–12483.
- 648 Latos, P.A., and Hemberger, M. (2016). From the stem of the placental tree: trophoblast stem cells and  
649 their progeny. *Development* 143, 3650–3660.
- 650 Lee, K.Y., Jeong, J.-W., Tsai, S.Y., Lydon, J.P., and DeMayo, F.J. (2007). Mouse models of implantation.  
651 *Trends in Endocrinology & Metabolism* 18, 234–239.
- 652 Li, X., Zhao, X., Fang, Y., Jiang, X., Duong, T., Fan, C., Huang, C.-C., and Kain, S.R. (1998). Generation of  
653 Destabilized Green Fluorescent Protein as a Transcription Reporter. *J. Biol. Chem.* 273, 34970–34975.
- 654 Luna-Zurita, L., and Bruneau, B.G. (2013). Chromatin modulators as facilitating factors in cellular  
655 reprogramming. *Current Opinion in Genetics & Development* 23, 556–561.
- 656 Macfarlan, T.S., Gifford, W.D., Driscoll, S., Lettieri, K., Rowe, H.M., Bonanomi, D., Firth, A., Singer, O.,  
657 Trono, D., and Pfaff, S.L. (2012). Embryonic stem cell potency fluctuates with endogenous retrovirus  
658 activity. *Nature* 487, 57–63.
- 659 Madan, P., Rose, K., and Watson, A.J. (2007). Na/K-ATPase  $\beta$ 1 Subunit Expression Is Required for  
660 Blastocyst Formation and Normal Assembly of Trophectoderm Tight Junction-associated Proteins. *J. Biol.*  
661 *Chem.* 282, 12127–12134.
- 662 Meissner, A., and Jaenisch, R. (2006). Generation of nuclear transfer-derived pluripotent ES cells from  
663 cloned Cdx2-deficient blastocysts. *Nature* 439, 212–215.
- 664 Mochida, K., Hasegawa, A., Otaka, N., Hama, D., Furuya, T., Yamaguchi, M., Ichikawa, E., Ijuin, M.,  
665 Taguma, K., Hashimoto, M., et al. (2014). Devising Assisted Reproductive Technologies for Wild-Derived  
666 Strains of Mice: 37 Strains from Five Subspecies of *Mus musculus*. *PLOS ONE* 9, e114305.

- 667 Monk, M., and Harper, M.I. (1979). Sequential X chromosome inactivation coupled with cellular  
668 differentiation in early mouse embryos. *Nature* 281, 311–313.
- 669 Nakaki, F., and Saitou, M. (2014). PRDM14: a unique regulator for pluripotency and epigenetic  
670 reprogramming. *Trends in Biochemical Sciences* 39, 289–298.
- 671 Nishioka, N., Inoue, K., Adachi, K., Kiyonari, H., Ota, M., Ralston, A., Yabuta, N., Hirahara, S., Stephenson,  
672 R.O., Ogonuki, N., et al. (2009). The Hippo Signaling Pathway Components Lats and Yap Pattern Tead4  
673 Activity to Distinguish Mouse Trophectoderm from Inner Cell Mass. *Developmental Cell* 16, 398–410.
- 674 Niwa, H., Miyazaki, J., and Smith, A.G. (2000). Quantitative expression of Oct-3/4 defines differentiation,  
675 dedifferentiation or self-renewal of ES cells. *Nat Genet* 24, 372–376.
- 676 Norwitz, E.R., Schust, D.J., and Fisher, S.J. (2001). Implantation and the Survival of Early Pregnancy. *New*  
677 *England Journal of Medicine* 345, 1400–1408.
- 678 Ohinata, Y., and Tsukiyama, T. (2014). Establishment of Trophectoderm Stem Cells under Defined Culture  
679 Conditions in Mice. *PLOS ONE* 9, e107308.
- 680 Ohtsuka, S., Nishikawa-Torikai, S., and Niwa, H. (2012). E-Cadherin Promotes Incorporation of Mouse  
681 Epiblast Stem Cells into Normal Development. *PLOS ONE* 7, e45220.
- 682 Okamoto, I., Otte, A.P., Allis, C.D., Reinberg, D., and Heard, E. (2004). Epigenetic Dynamics of Imprinted  
683 X Inactivation During Early Mouse Development. *Science* 303, 644–649.
- 684 Parchem, R.J., Ye, J., Judson, R.L., LaRussa, M.F., Krishnakumar, R., Blleloch, A., Oldham, M.C., and  
685 Blleloch, R. (2014). Two miRNA Clusters Reveal Alternative Paths in Late-Stage Reprogramming. *Cell*  
686 *Stem Cell* 14, 617–631.
- 687 Payer, B., Lee, J.T., and Namekawa, S.H. (2011). X-inactivation and X-reactivation: epigenetic hallmarks  
688 of mammalian reproduction and pluripotent stem cells. *Hum Genet* 130, 265–280.
- 689 Payer, B., Rosenberg, M., Yamaji, M., Yabuta, Y., Koyanagi-Aoi, M., Hayashi, K., Yamanaka, S., Saitou, M.,  
690 and Lee, J.T. (2013). Tsix RNA and the Germline Factor, PRDM14, Link X Reactivation and Stem Cell  
691 Reprogramming. *Molecular Cell* 52, 805–818.
- 692 Peng, J., Fullerton, P.T., Monsivais, D., Clementi, C., Su, G.H., and Matzuk, M.M. (2015). Uterine Activin-  
693 Like Kinase 4 Regulates Trophectoderm Development During Mouse Placentation. *Mol Endocrinol* 29, 1684–  
694 1693.
- 695 Ralston, A., and Rossant, J. (2008). Cdx2 acts downstream of cell polarization to cell-autonomously  
696 promote trophectoderm fate in the early mouse embryo. *Developmental Biology* 313, 614–629.
- 697 Rings, E.H.H.M., Boudreau, F., Taylor, J.K., Moffett, J., Suh, E.R., and Traber, P.G. (2001). Phosphorylation  
698 of the serine 60 residue within the Cdx2 activation domain mediates its transactivation capacity.  
699 *Gastroenterology* 121, 1437–1450.

- 700 Rossant, J., and Ofer, L. (1977). Properties of extra-embryonic ectoderm isolated from postimplantation  
701 mouse embryos. *Development* 39, 183–194.
- 702 Sakaki-Yumoto, M., Liu, J., Ramalho-Santos, M., Yoshida, N., and Derynck, R. (2013). Smad2 Is Essential  
703 for Maintenance of the Human and Mouse Primed Pluripotent Stem Cell State. *J. Biol. Chem.* 288,  
704 18546–18560.
- 705 Schoorlemmer, J., Pérez-Palacios, R., Climent, M., Guallar, D., and Muniesa, P. (2014). Regulation of  
706 Mouse Retroelement MuERV-L/MERVL Expression by REX1 and Epigenetic Control of Stem Cell Potency.  
707 *Front. Oncol.* 4.
- 708 Screen, M., Dean, W., Cross, J.C., and Hemberger, M. (2008). Cathepsin proteases have distinct roles in  
709 trophoblast function and vascular remodelling. *Development* 135, 3311–3320.
- 710 Seydoux, G., and Braun, R.E. (2006). Pathway to Totipotency: Lessons from Germ Cells. *Cell* 127, 891–  
711 904.
- 712 Silva, J., Nichols, J., Theunissen, T.W., Guo, G., van Oosten, A.L., Barrandon, O., Wray, J., Yamanaka, S.,  
713 Chambers, I., and Smith, A. (2009). Nanog Is the Gateway to the Pluripotent Ground State. *Cell* 138,  
714 722–737.
- 715 Simmons, D.G., and Cross, J.C. (2005). Determinants of trophoblast lineage and cell subtype specification  
716 in the mouse placenta. *Developmental Biology* 284, 12–24.
- 717 Simmons, D.G., Fortier, A.L., and Cross, J.C. (2007). Diverse subtypes and developmental origins of  
718 trophoblast giant cells in the mouse placenta. *Developmental Biology* 304, 567–578.
- 719 Stephenson, R.O., Yamanaka, Y., and Rossant, J. (2010). Disorganized epithelial polarity and excess  
720 trophectoderm cell fate in preimplantation embryos lacking E-cadherin. *Development* 137, 3383–3391.
- 721 Steward, F.C., Mapes, M.O., and Mears, K. (1958). Growth and Organized Development of Cultured Cells.  
722 II. Organization in Cultures Grown from Freely Suspended Cells. *American Journal of Botany* 45, 705–  
723 708.
- 724 Strumpf, D., Mao, C.-A., Yamanaka, Y., Ralston, A., Chawengsaksophak, K., Beck, F., and Rossant, J.  
725 (2005). Cdx2 is required for correct cell fate specification and differentiation of trophectoderm in the  
726 mouse blastocyst. *Development* 132, 2093–2102.
- 727 Tamm, C., Böwer, N., and Annerén, C. (2011). Regulation of mouse embryonic stem cell self-renewal by  
728 a Yes–YAP–TEAD2 signaling pathway downstream of LIF. *J Cell Sci* 124, 1136–1144.
- 729 Tang, F., Barbacioru, C., Bao, S., Lee, C., Nordman, E., Wang, X., Lao, K., and Surani, M.A. (2010). Tracing  
730 the Derivation of Embryonic Stem Cells from the Inner Cell Mass by Single-Cell RNA-Seq Analysis. *Cell*  
731 *Stem Cell* 6, 468–478.

- 732 Tesar, P.J., Chenoweth, J.G., Brook, F.A., Davies, T.J., Evans, E.P., Mack, D.L., Gardner, R.L., and McKay,  
733 R.D. (2007). New cell lines from mouse epiblast share defining features with human embryonic stem  
734 cells. *Nature* 448, 196–199.
- 735 Tomioka, M., Nishimoto, M., Miyagi, S., Katayanagi, T., Fukui, N., Niwa, H., Muramatsu, M., and Okuda,  
736 A. (2002). Identification of Sox-2 regulatory region which is under the control of Oct-3/4–Sox-2 complex.  
737 *Nucl. Acids Res.* 30, 3202–3213.
- 738 Wang, H., and Dey, S.K. (2006). Roadmap to embryo implantation: clues from mouse models. *Nat Rev*  
739 *Genet* 7, 185–199.
- 740 Wilson, I.B. (1963). A Tumour Tissue Analogue of the Implanting Mouse Embryo. *Proceedings of the*  
741 *Zoological Society of London* 141, 137–151.
- 742 Wu, G., Lei, L., and Schöler, H.R. (2017). Totipotency in the mouse. *J Mol Med* 95, 687–694.
- 743 Wu, J., Huang, B., Chen, H., Yin, Q., Liu, Y., Xiang, Y., Zhang, B., Liu, B., Wang, Q., Xia, W., et al. (2016).  
744 The landscape of accessible chromatin in mammalian preimplantation embryos. *Nature* 534, 652–657.
- 745 Yamaji, M., Seki, Y., Kurimoto, K., Yabuta, Y., Yuasa, M., Shigeta, M., Yamanaka, K., Ohinata, Y., and  
746 Saitou, M. (2008). Critical function of Prdm14 for the establishment of the germ cell lineage in mice. *Nat*  
747 *Genet* 40, 1016–1022.
- 748 Yang, S., Yuan, Q., Niu, M., Hou, J., Zhu, Z., Sun, M., Li, Z., and He, Z. (2017). BMP4 promotes mouse iPS  
749 cell differentiation to male germ cells via Smad1/5, Gata4, Id1 and Id2. *Reproduction* 153, 211–220.  
750
- 751 Yang, Y., Liu, B., Xu, J., Wang, J., Wu, J., Shi, C., Xu, Y., Dong, J., Wang, C., Lai, W., et al. (2017). Derivation  
752 of Pluripotent Stem Cells with In Vivo Embryonic and Extraembryonic Potency. *Cell* 169, 243–257.e25.
- 753 Ying, Q.-L., Nichols, J., Chambers, I., and Smith, A. (2003). BMP Induction of Id Proteins Suppresses  
754 Differentiation and Sustains Embryonic Stem Cell Self-Renewal in Collaboration with STAT3. *Cell* 115,  
755 281–292.
- 756 Yu, C., Ji, S.-Y., Dang, Y.-J., Sha, Q.-Q., Yuan, Y.-F., Zhou, J.-J., Yan, L.-Y., Qiao, J., Tang, F., and Fan, H.-Y.  
757 (2016). Oocyte-expressed yes-associated protein is a key activator of the early zygotic genome in mouse.  
758 *Cell Research* 26, 275–287.

759 **FIGURES**

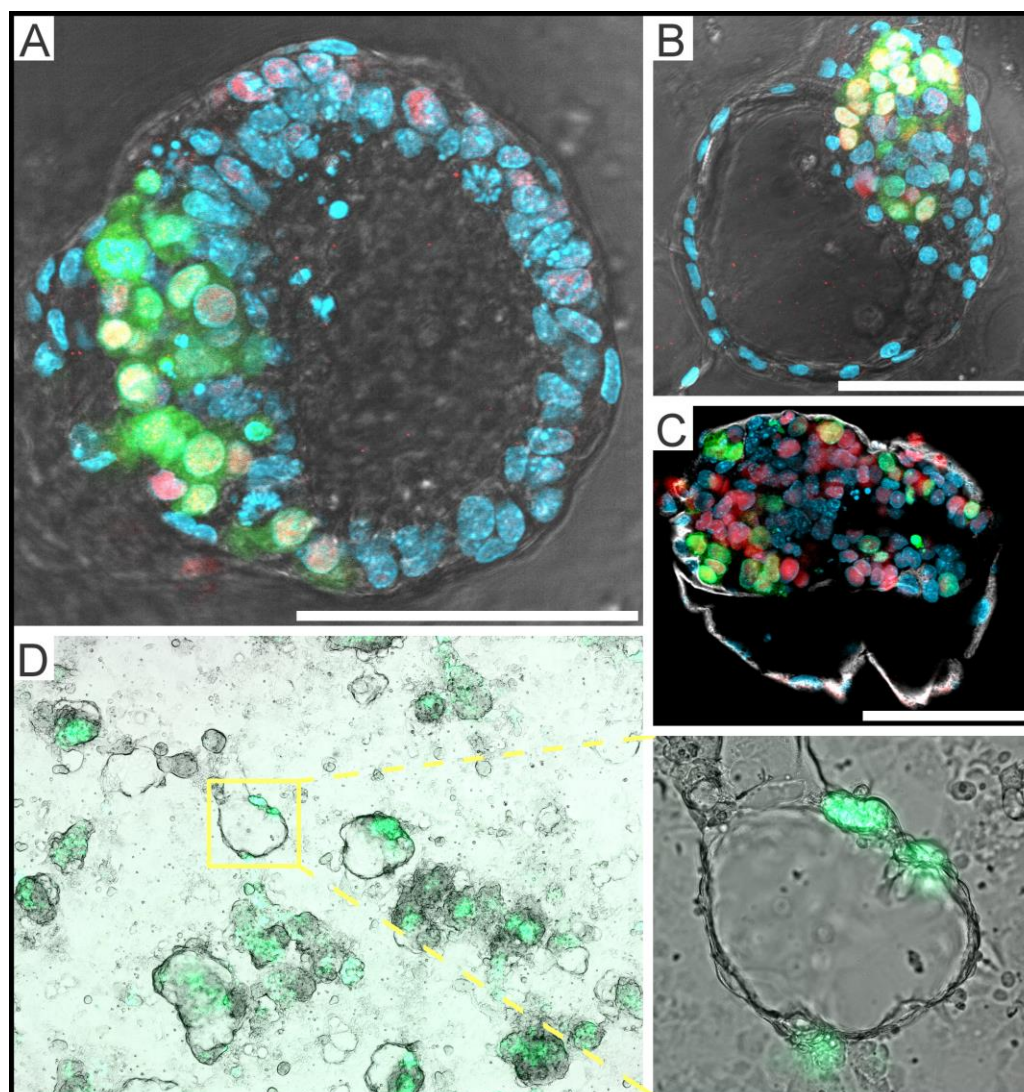

760

761 **FIGURE 1: Blastocyst-Like Hemispheres Suggest Bi-Directional Potential**

762 For All: Green = XGFP+ (Xa/Xa-GFP), Red = NANOG, Light Blue = DNA; Hoechst 33342. All scale bars = 100  $\mu$ m.

763 **A)** Blastocoel-like fluid filled oversized hemisphere with NANOG+XGFP+ inner cells, NANOG+XGFP-spheroid cells,  
764 and NANOG-XGFP- in flattened TE-like cells. XGFP+ cells exclusively indicate euchromatin characteristics (Figure  
765 S1A).

766 **B)** Late BC-like hemisphere with NANOG+ cells restricted to XGFP+ cells and NANOG-XGFP- TE-like cells  
767 surrounding the fluid filled cyst.

768 **C)** TE lineage marker positive cells (white; TROMA-1) surrounding the fluid filled hemisphere with oversized  
769 NANOG+XGFP+ polar mass.

770 **D)** X chromosome reactivation indicated by XGFP+ cells as polar masses among fluid filled hemispheres in naive  
771 conversion experiments.

772

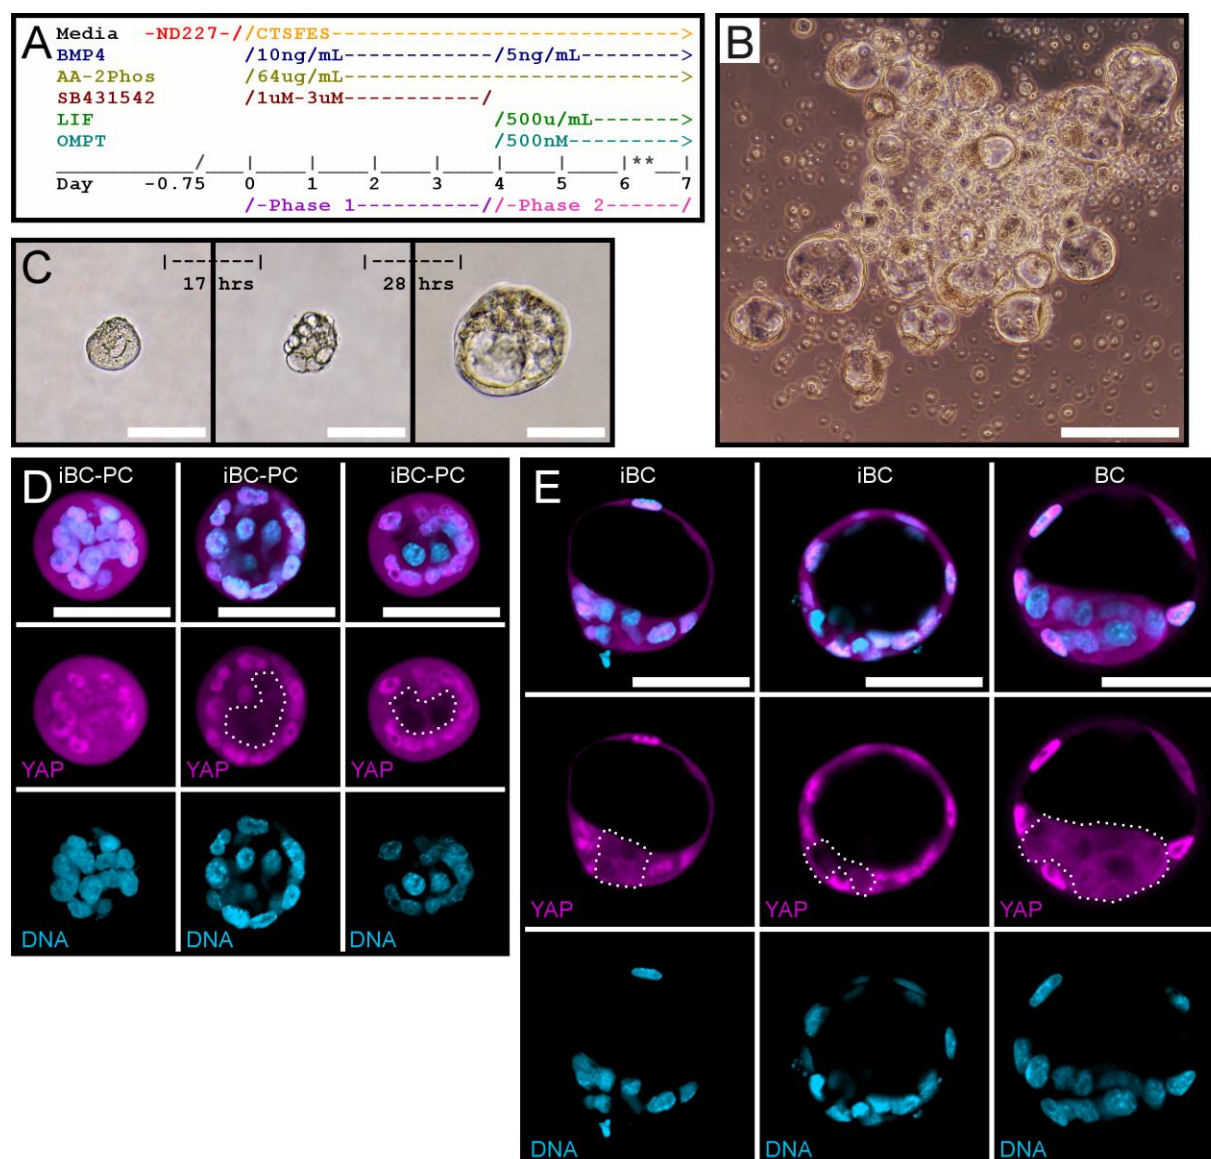

773

774 **FIGURE 2: Defined Conditions Release Early Embryo-Like iBC-PCs and Polarizing iBCs to Suspension**

775 **A)** Two-phase iBC induction media timing to induce mEpiSC to iBCs. *\*\*Supernatant iBC-PC are collected to ultra-*  
 776 *low attachment(ULA) wells on Day 6, and high-quality BC-like iBCs are selected on Day 7 by embryo pipette.*

777 **B)** iBCs are pooled in ULA plate for downstream experiments. *Scale bar = 200  $\mu$ m.*

778 **C)** Isolated predicted iBC-PC developing into iBC over time. *Scale bars = 100  $\mu$ m.*

779 **D)** iBC-PC stained for YAP (magenta) and DNA (light blue, Hoechst 33342). *Scale bars = 50  $\mu$ m. Nuclear-excluded*  
 780 *YAP region is outlined with dotted white line.*

781 **E)** Early iBCs and early BCs stained for YAP (magenta) and DNA (light blue, Hoechst 33342). *Scale bars = 50  $\mu$ m.*

782 *Nuclear-excluded YAP region is outlined with dotted white line.*

783

784

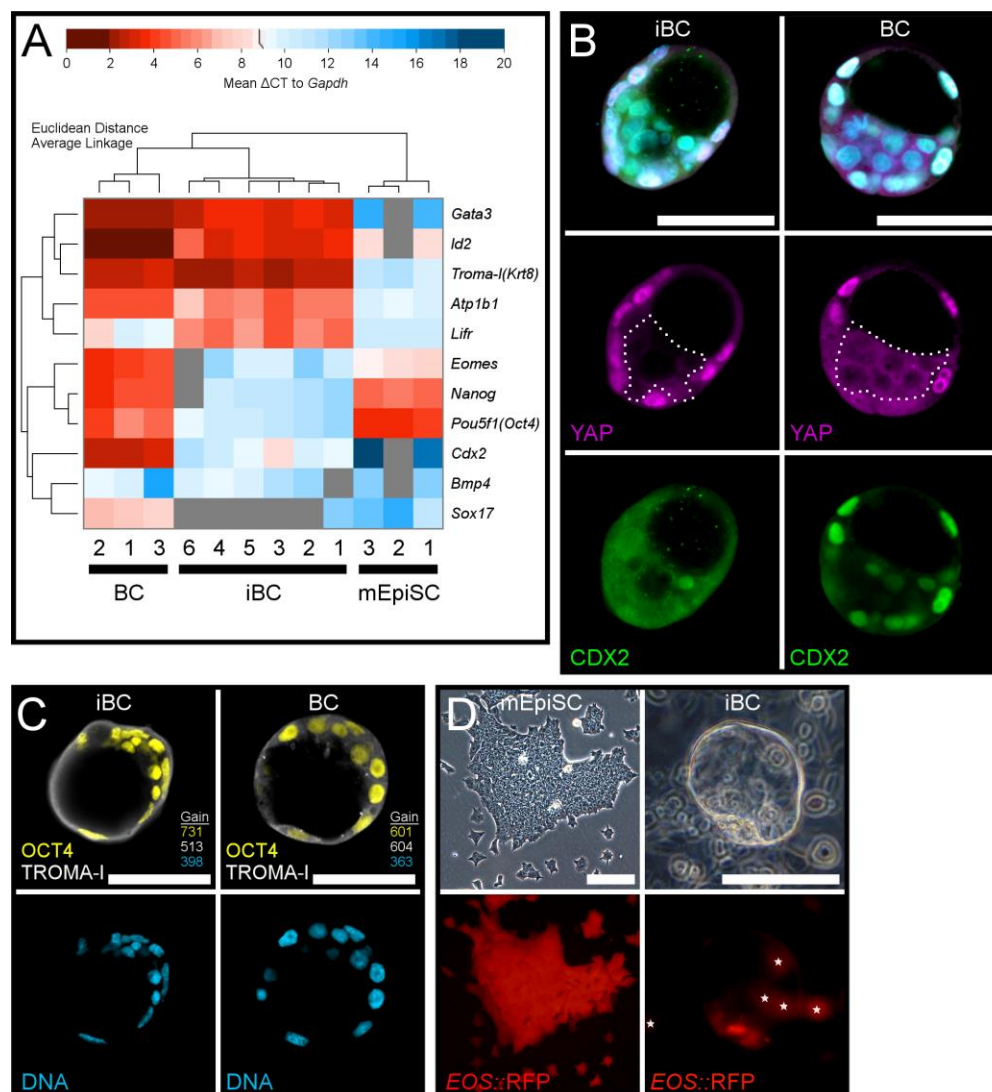

785

786 **FIGURE 3: iBCs Share Many Molecular Characteristics with BCs**

787 **A)** RT-qPCR of single BC, iBC, and mEpiSC cDNA samples, with Euclidean distance and clustering by average linkage,  
788 represented as a heat map of global  $\Delta$ CT to *Gapdh*.

789 **B)** Early iBCs and early BCs stained for YAP (magenta), CDX2 (green) and DNA (light blue, Hoechst 33342). Scale  
790 bars = 50  $\mu$ m. Nuclear-excluded YAP region is outlined with dotted white line.

791 **C)** Early iBC and early BC stained for TROMA-I (white), OCT4 (yellow), and DNA (light blue, Hoechst 33342).  
792 Comparable microscopy setting detector gains have target matched colors (see methods; Table S2). Scale bars =  
793 50  $\mu$ m.

794 **D)** mEpiSC express live pluripotency reporter *EOS::RFP*, and late iBC above culture with *EOS::RFP* expression largely  
795 in the putative ICM. White stars label out of focus *EOS::RFP*<sup>+</sup> cells on the plate. Scale bars = 100  $\mu$ m.

796



797

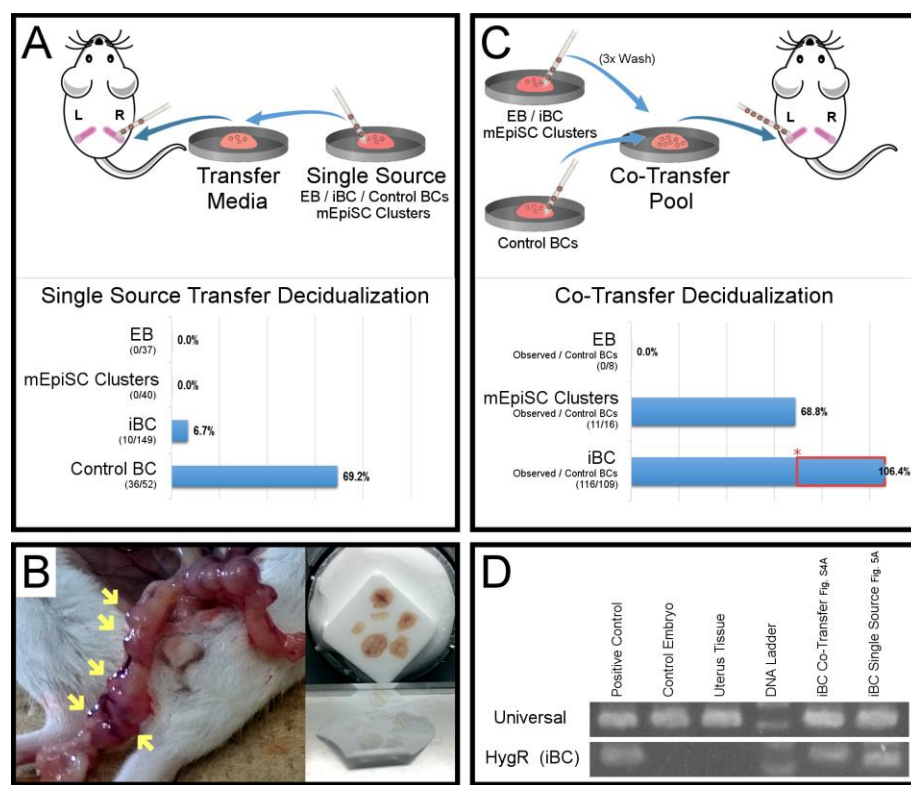

798

799 **FIGURE 4: iBC Uterus Transfer Decidualization in Pseudopregnant Mice**

800 *Embryo pipettes indicate when a new pipette was used.*

801 **A)** Single source uterus transfer experiment diagram. Observed deciduae in uterus horns with respect to EB,  
802 mEpiSC clusters, iBC, or control BC single source uterus transfers.

803 **B)** Uterus horn of mouse with iBC implanted deciduae (left, yellow arrows), prepared for cryosection (right).

804 **C)** EB or mEpiSC clusters or iBC co-transfer with BCs uterus transfer experiment diagram. Observed deciduae from  
805 EB co-transfer, mEpiSC Cluster co-transfer, and iBC co-transfer. \* = control BC decidualization rate (69.2%, Figure  
806 4A); Red box indicates decidualization gained from iBCs.)

807 **D)** LCM genomic DNA PCR test for mouse genomic DNA universal and iBC-specific hygromycin resistance. LCM  
808 samples from figure H&E slides are shown in Figure S4A.

809

810

811

812

813

814

815

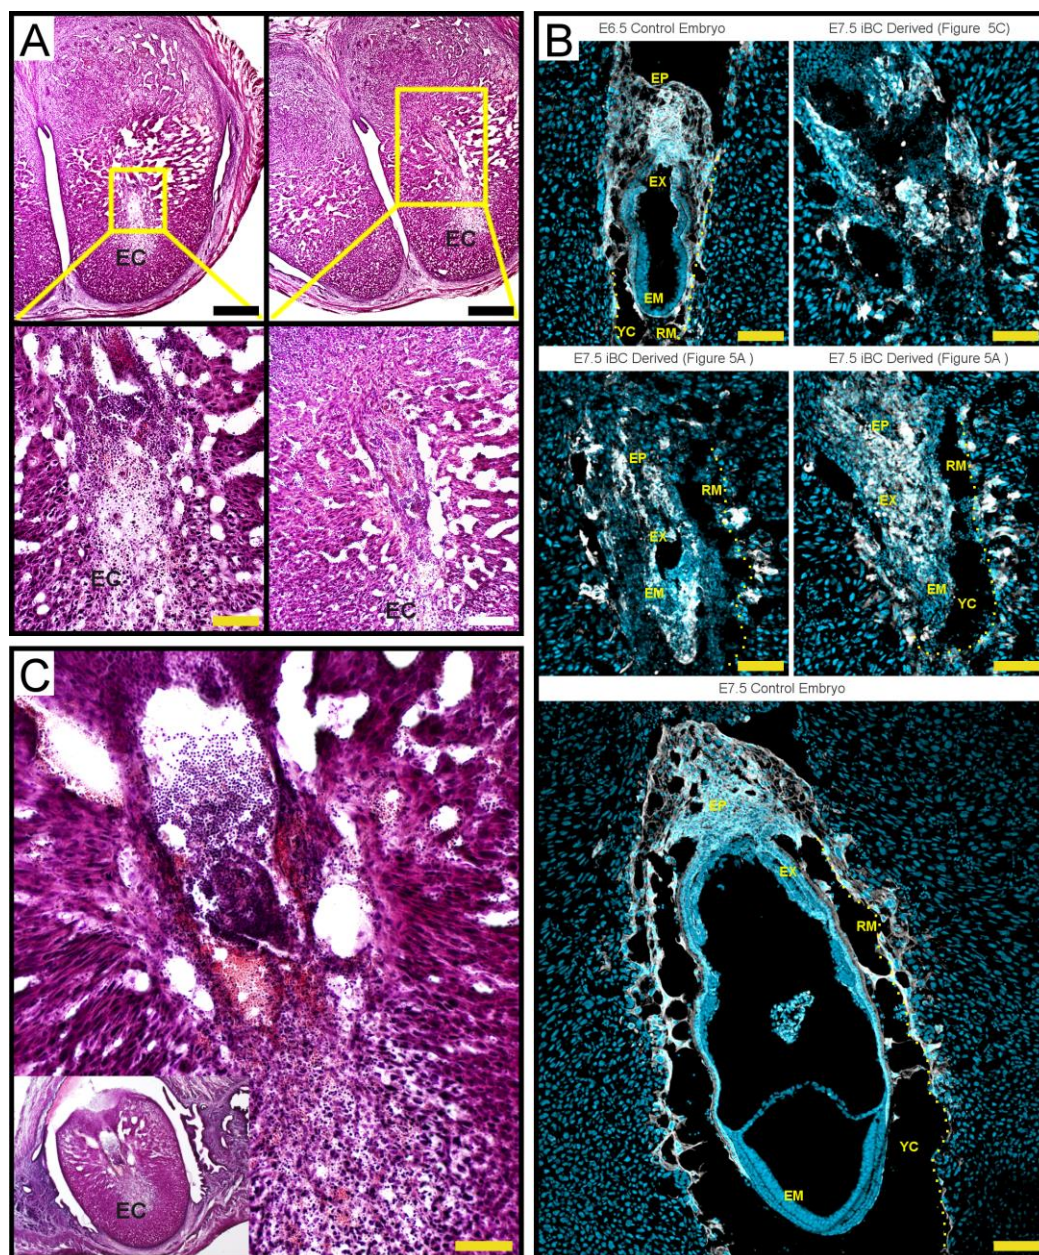

816

817 **FIGURE 5: iBCs Implant and Partially Develop Before Resorption**

818 *EC, Embryonic Cavity*

819 **A)** H&E-stained proximal cryosections of deciduae from iBC single source transfer. Higher magnification is  
820 indicated and shows iBC-derived tissue resembling large cell masses of resorbing tissues.

821 *Scale Bars: Upper panels = 500  $\mu$ m, Lower Left = 100  $\mu$ m, and Lower Right = 200  $\mu$ m.*

822 **B)** Cryosection IHC for ExEm TROMA-I (white), and DNA (light blue; Hoechst 33342). E6.5 and E7.5 control embryos  
823 show healthy size and structure. E7.5 iBC-derived tissues from cryosections proximal to Figure 5A and Figure 5C  
824 are labeled. *EP, ectoplacental cone; EX, extraembryonic portion; EM, embryonic portion; YC, yolk sac cavity; RM &*

26

825 *dotted line, Reichert's Membrane labeled on one side for clarity. Scale bars = 100  $\mu$ m.*

826 **C)** H&E stained decidua from iBC single source transfer section shows high presence of immune cells resorbing a  
827 mass of cells with ExEm-like and Em-like stain and morphology. *Scale bar = 100  $\mu$ m.*

828

829

830

831

832

833

834

835

836

837

838

839

840

841

842

843

844

845

846

847

848

849

850

851

852

853

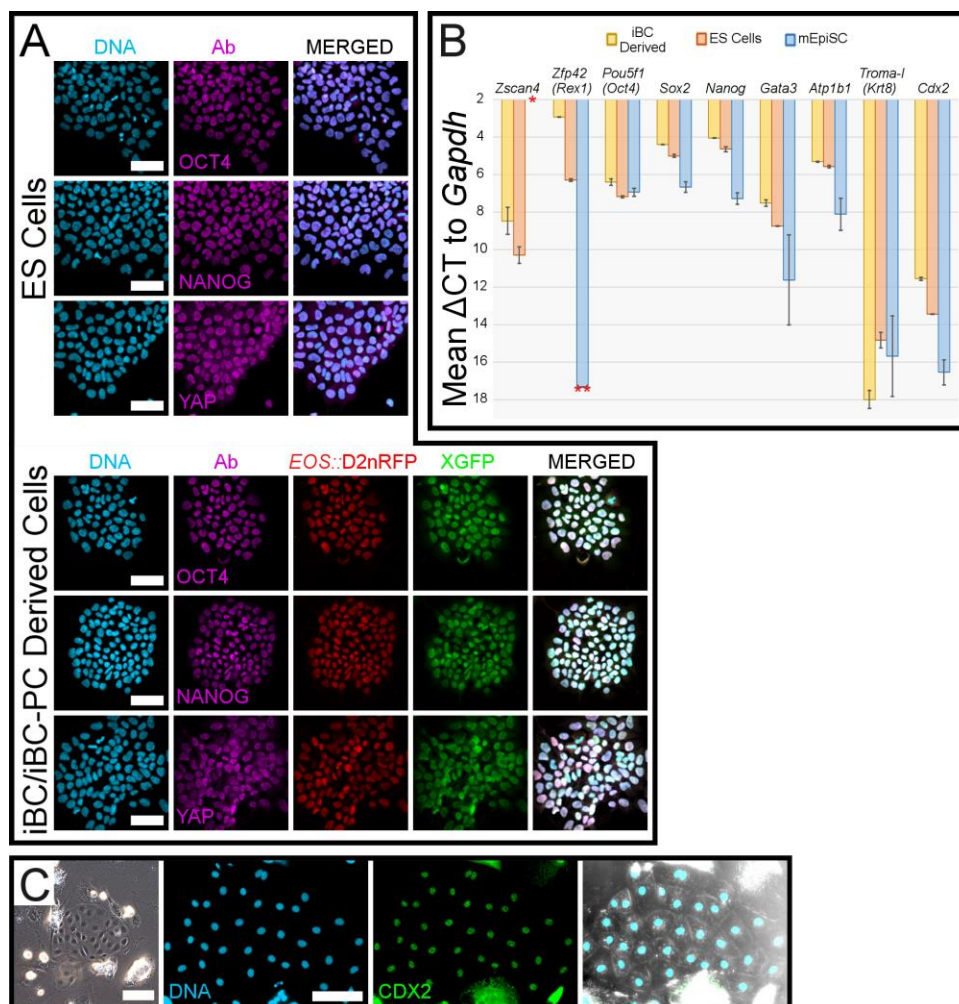

854

855 **FIGURE 6: iBC/iBC-PC-Derived Outgrowths Suggest *In-Vitro* Bi-Directional Potential.**

856 **A)** Mouse ES cells and iBC/iBC-PC-derived ES-like cells stained for OCT4, NANOG, or YAP (magenta), and DNA (light  
857 blue, Hoechst 33342). iBC/iBC-PC-derived ES-like cells demonstrate X chromosome reactivation (XGFP+) and  
858 express *EOS::D2nRFP*. Scale bars = 50  $\mu$ m.

859 **B)** RT-qPCR of mouse ES cells, iBC/iBC-PC-derived ES-like cells, and mEpiSC cDNA samples, shown as mean  $\Delta$ CT to  
860 *Gapdh*. Data represents two biological samples per type and all probes tested in technical triplicate. Error bars  
861 represent standard deviation between the two biological samples. \* = no detectable *Zscan4* signal in mEpiSC  
862 samples. \*\* = one mEpiSC biological sample did not have detectable *Zfp42 (Rex1)*, and therefore no standard  
863 deviation.

864 **C)** Left: Live imaging of iBC derived TE-like cells. Right: TE-like cells were stained for CDX2 (Green) and DNA (light  
865 blue, Hoechst 33342). Channels shown separately and merged. Scale bars = 100 $\mu$ m.

866

867

868

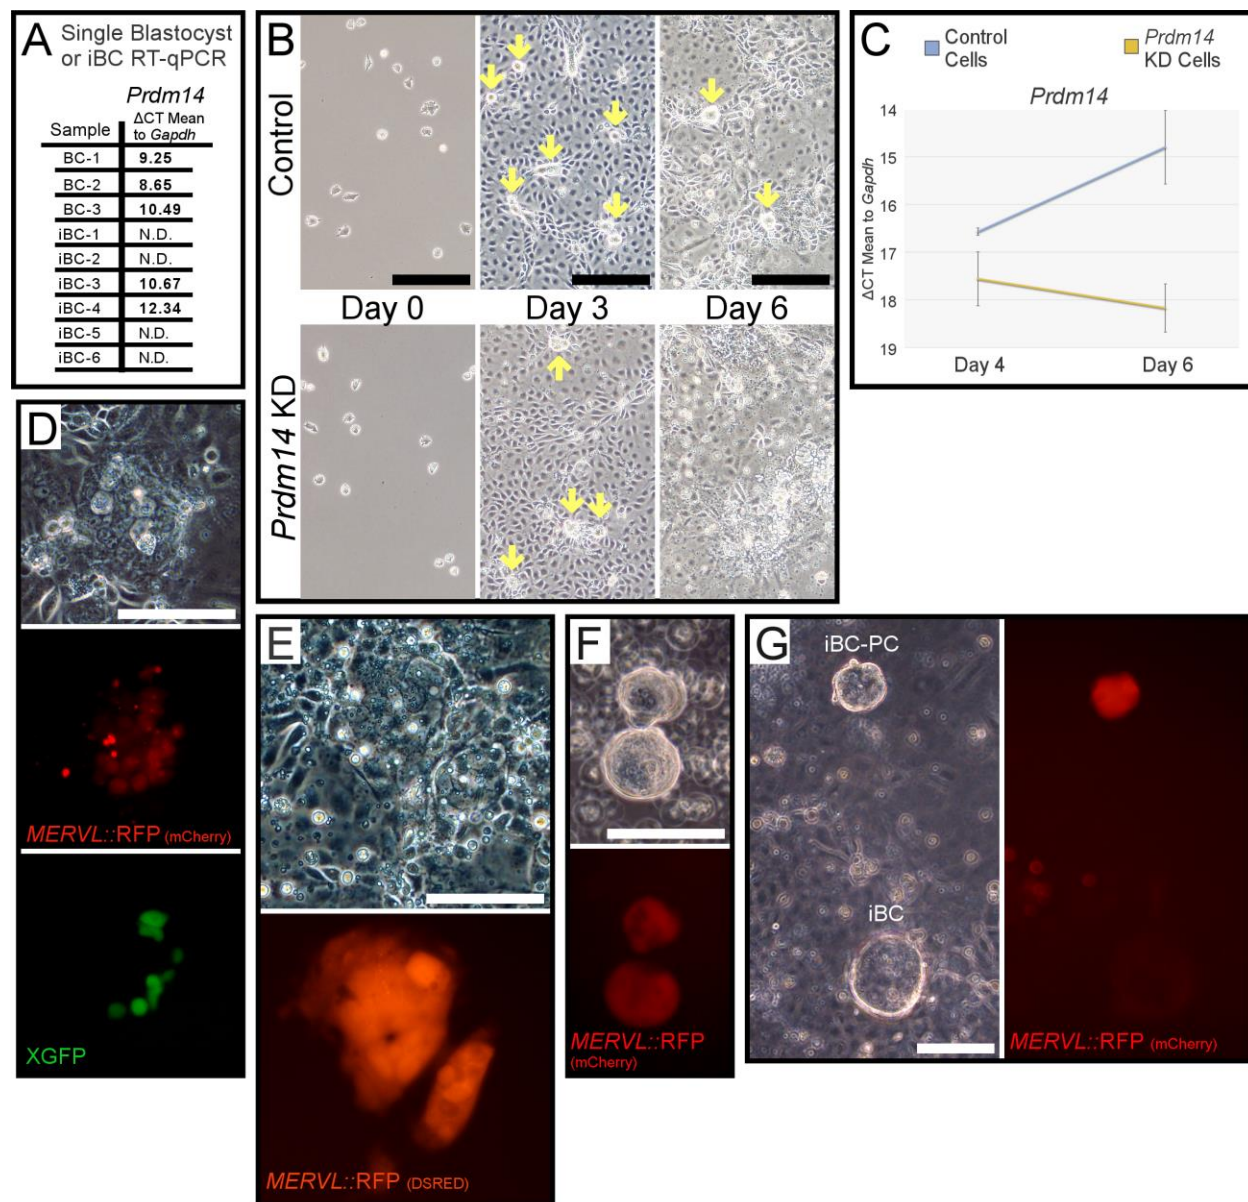

869

870 **FIGURE 7: iBC Generation Requires *Prdm14* and Activates *MERVL* Reporter in iBC-PCs**

871 **A)** Single isolated BC and iBC RT-qPCR for *Prdm14*.

872 **B)** Control and *Prdm14* KD mEpiSC are plated for iBC induction. Loci that originate iBC-PC are initiated in both  
873 experiments by Day 3 (yellow arrows). Control cells maintain iBC-PC induction through Day 6 (yellow arrows) and  
874 *Prdm14* KD cells abort iBC-PCs among cell debris. Scale bars = 200 $\mu$ m.

875 **C)** RT-qPCR of control and *Prdm14* KD cell plate cDNA samples for *Prdm14* in iBC generation, shown as mean  $\Delta$ CT  
876 to *Gapdh*. Error bars represent standard deviation from technical triplicate.

877 **D)** iBC induction Day 6 colocalized expression of *MERVL::RFP* and XGFP+ reporters. Scale bar = 100  $\mu$ m.

878 **E)** After iBC are collected, iBC generation plate on Day 7 retained some larger *MERVL::RFP*+ cells with cleavage

879 stage cell-like morphology. *Scale bar = 100um.*

880 **F)** Live fluorescent image of iBC-PCs expressing *MERVL::RFP* in ULA plate on Day 6. *Scale bar = 100 μm.*

881 **G)** Live fluorescent image of *MERVL::RFP* expressed strongly in iBC-PC yet poorly detected in emergent iBC, seen in  
882 culture on Day 8. *Scale bar = 100 μm.*

883

884

885

886

887

888

889

890

891

892

893

894

895

896

897

898

899

900

901

902

903

904

905

906

907

908

909

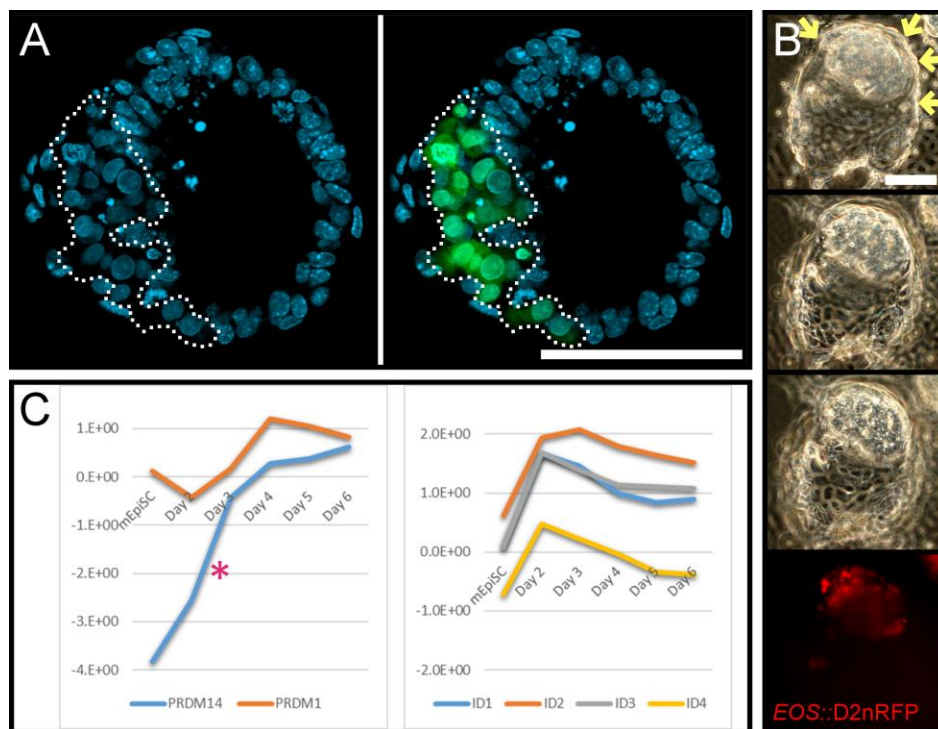

910

911 **FIGURE S1: Related to Figure 1**

912 **Naïve Conversion Induces Blastocyst-Like Hemispheres and Prdm and Id Gene mRNAs.**

913 **A)** Image from Figure 1A structure with XGFP+ cells outlined, +/- the XGFP image layer. XGFP- cells have bright DNA  
914 stain punctae indicating condensed DNA in heterochromatin (light blue; Hoechst 33342). XGFP+ cells lack bright  
915 DNA punctae. *Scale bar = 100  $\mu$ m.*

916 **B)** Naïve conversion BC-like hemisphere with EOS::D2nRFP+ expression restricted to the putative ICM surrounded  
917 by TE-like cells (yellow arrows), across three Z-positions. *Scale bar = 100  $\mu$ m.*

918 **C)** RT-qPCR of naïve conversion time course cDNA samples shows strong induction of *Id* genes in two days (right).  
919 *Prdm14* is induced from near undetectable signal in mEpiSC and *Prdm1* is partially maintained before ~10-fold  
920 increase after 4 days (left). \**Prdm14* time-course was reported in (Kime et al., 2016).

921

922

923

924

925

926

927

928

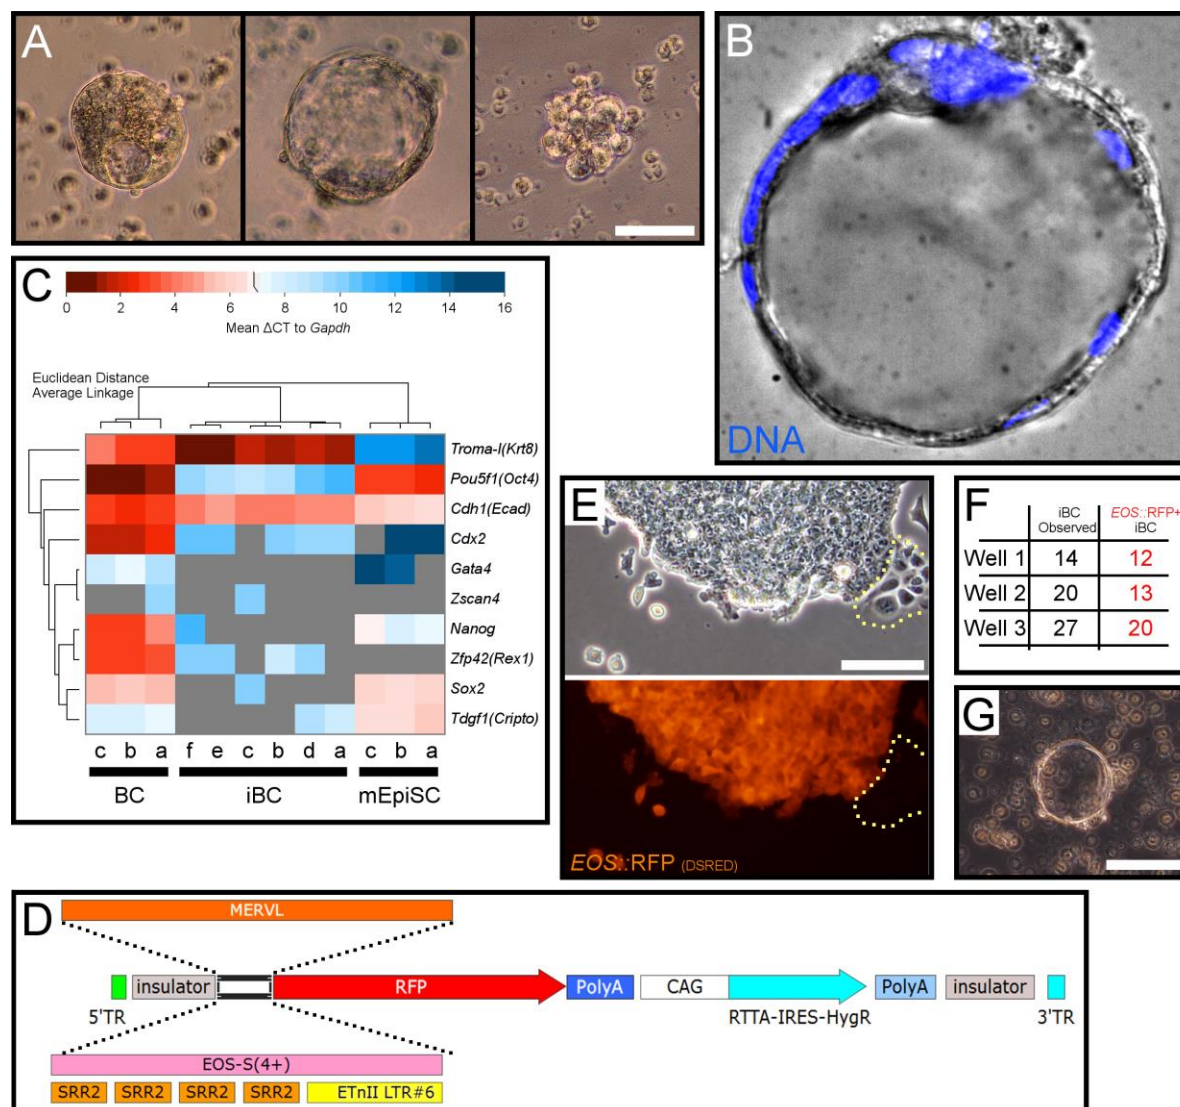

929

930 **FIGURE S2: Related to Figure 2, Figure 3, and Figure 7**

931 **iBC Characterization and Reporter Constructs**

932 **A)** Early embryo-like structures are released to suspension. Scale bar (all) = 50  $\mu$ m.

933 **B)** Late iBC stained for DNA (Blue; Hoechst 33342).

934 **C)** RT-qPCR of single early BC, early iBC, and mEpiSC cDNA samples, with Euclidean distance and clustering by average linkage, represented as a heat map of  $\Delta$ CT to *Gapdh*.

935  
936 **D)** Schematic of piggyback reporter systems in this study: *MERVL* or *EOS-S(4+)* synthetic promoters followed by

937 *RFP*. *RFP* used are *DSRED*, *mCherry*, or *D2nRFP* (see methods).

938 **E)** *EOS::RFP+* mEpiSC and *EOS::RFP-* differentiating cells. Differentiating cells are outlined with yellow dotted line.

939 Scale bar = 100  $\mu$ m.

940 **F)** 6W wells of iBC generation were harvested to ULA plates on Day 6, and counted on Day 7 as total yield and

32



941 those that were *EOS::RFP+*. *Scale bar = 100 μm.*

942 **G)** iBC induced from another published mEpiSC line (Tesar et al., 2007). *Scale bar = 100 μm.*

943

944

945

946

947

948

949

950

951

952

953

954

955

956

957

958

959

960

961

962

963

964

965

966

967

968

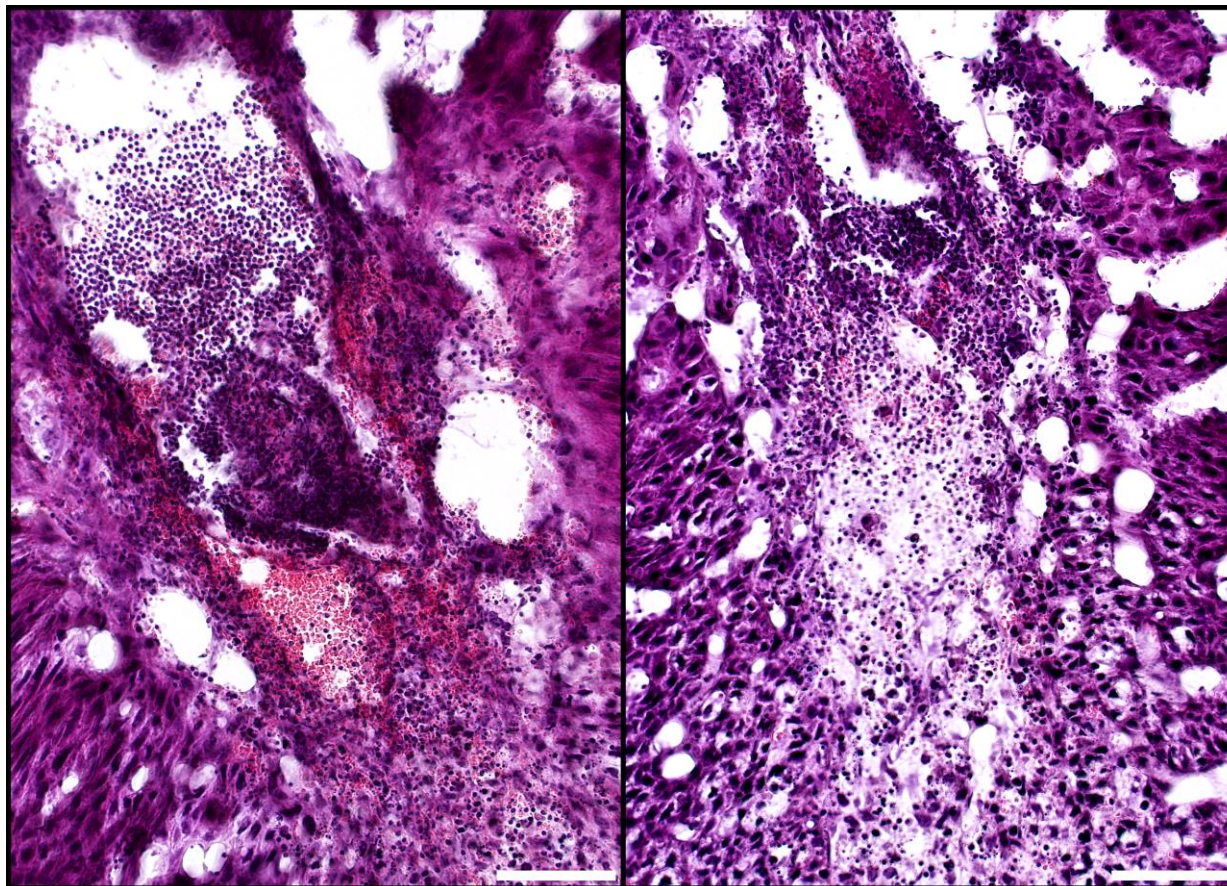

969

970

**FIGURE S3: Related to Figure 5**

971

**iBCs Implanted Tissues Are Resorbed by Immune Cells**

972

Larger images of H&E stain for E7.5 iBC single source transfer deciduae cryosections. Deciduae had many blood

973

sinuses and ExEm-like cells at the periphery of resorbing tissue. Maternal immune cells were highly present

974

throughout the area, appearing to have accumulated from the blood sinuses. Loosely arranged ExEm-like cells

975

appeared to retract within a degrading embryonic cavity and surrounding small darker stained cells resembling Em

976

cells seen in healthy control embryos (Figure S4). *Scale bars = 100  $\mu$ m.*

977

978

979

980

981

982

983

984

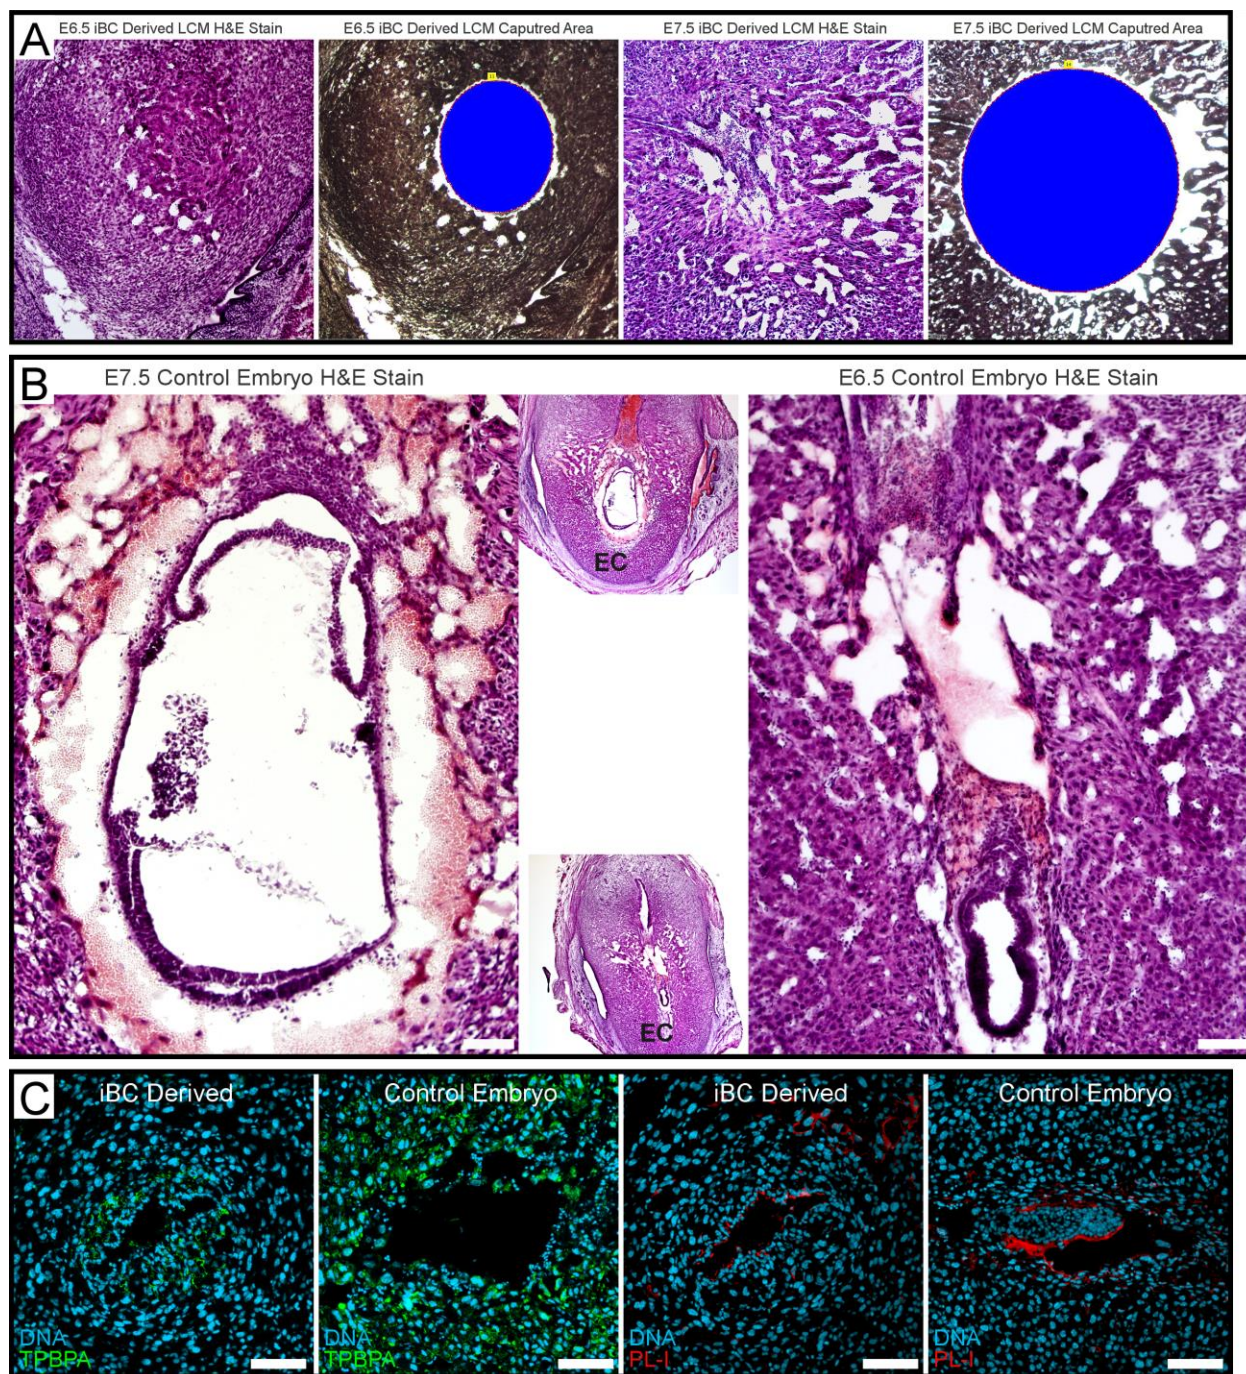

985

986

987

988

989

**FIGURE S4: Related to Figure 4, Figure 5**

**A)** H&E stain and LCM sampled areas (Blue) of proximal sections from the iBC derived tissue for E7.5 iBC single source uterus transfer from Figure 5A,B, and a E6.5 iBC co-transfer sample. *The LCM samples were used for genomic DNA PCR in Figure 4D.*

35

990 **B)** H&E stain for E7.5 and E6.5 control embryos for reference. Lower magnification images of the full decidua  
991 section with uterine tissue is set to the side. *EC, embryonic cavity. Scale bars = 100  $\mu$ m.*  
992 **C)** Cryosection IHC for post-implantation ExEm lineage markers TPBPA (Green, Left) and PL-I (Red, Right), and DNA  
993 (light blue, Hoechst 33342) on E6.5 iBC-derived and control embryo derived deciduae embryonic cavity regions.

994

995

996

997

998

999

1000

1001

1002

1003

1004

1005

1006

1007

1008

1009

1010

1011

1012

1013

1014

1015

1016

1017

1018

1019

1020

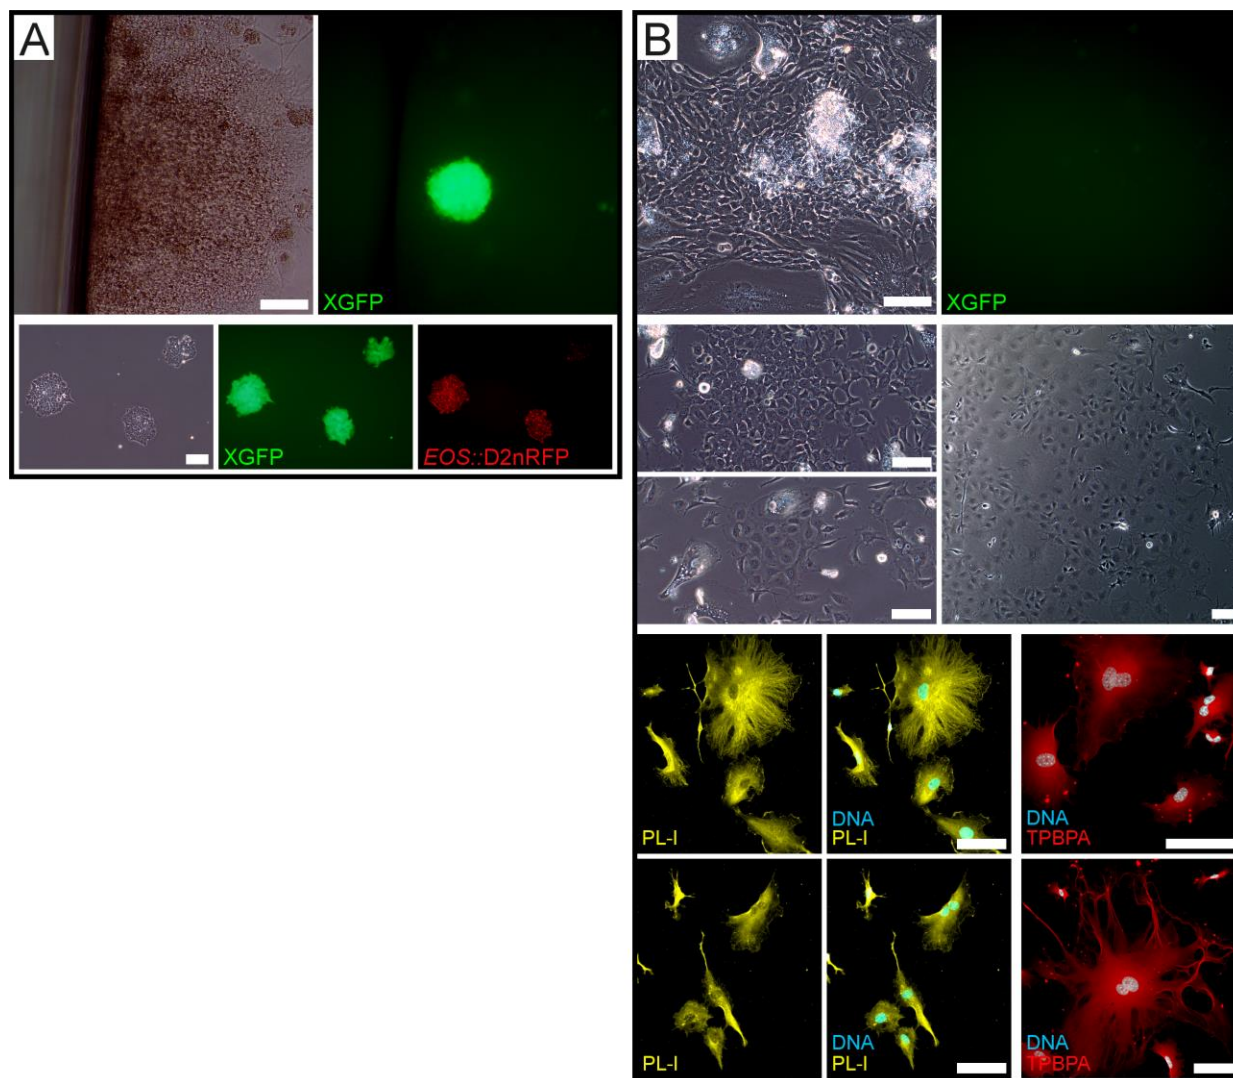

1021

1022 **FIGURE S5: Related to Figure 6**

1023 **iBC/iBC-PC-Derived Outgrowths Produce ES-Like Cells and TE Lineage Marker-Positive Cells.**

1024 **A)** *EOS::D2nRFP* mEpiSC induced iBC and iBC-PC were plated on feeders in ES cell derivation conditions. Cells  
1025 activated the XGFP reporter (upper panel) and stabilized similar to ES cells after several passages and maintained  
1026 XGFP and *EOS::D2nRFP* expression. *Scale bars = 100 μm.*

1027 **B)** *EOS::D2nRFP* mEpiSC induced iBC and iBC-PC were plated on feeders in TE cell-culture conditions. Outgrowths  
1028 mostly did not activate the XGFP reporter (upper panel) and could expand for two passages into TE-like and  
1029 binuclear cells (middle panels). Cells were passaged to slides and stained for post-implantation ExEm cell markers  
1030 PL-I (yellow, lower left) and TPBPA (red, lower right), and DNA (light blue, Hoechst 33342). *Scale bars = 100 μm.*

1031

1032 **VIDEO S1: Blastocyst-Like Hemisphere Imaged from Z-stack**

1033 A late BC-like hemisphere imaged across the z-dimension, visualized as a composite 3D model and animated for  
1034 viewing from several angles. XGFP+NANOG+ cells are restricted to a polar mass of the fluid filled dome surrounded  
1035 by large flat cells with large flat nuclei. Green = XGFP+; Red = NANOG+; Blue = DNA, Hoechst 33342.

1036

1037

1038

1039

1040

1041

1042

1043

1044

1045

1046

1047

1048

1049

1050

1051

1052

1053

1054

1055

1056

1057

1058

1059

1060

1061

1062

| <b>iBC Observed Date *</b> | <b>Relative Yield **</b> |
|----------------------------|--------------------------|
| 10/25/2014                 | +                        |
| 11/25/2014                 | +                        |
| 12/27/2014                 | +                        |
| 7/14/2015                  | +                        |
| 8/4/2015                   | +                        |
| 10/21/2015                 | +                        |
| 10/28/2015                 | +                        |
| 2/26/2016                  | +                        |
| 3/17/2016                  | ++                       |
| 3/31/2016                  | ++                       |
| 5/12/2016                  | ++                       |
| 6/13/2016                  | ++                       |
| 9/15/2016                  | ++                       |
| 10/27/2016                 | ++                       |
| 11/17/2016                 | +++                      |
| 1/8/2017                   | +++                      |
| 2/8/2017                   | ++                       |
| 4/25/2017                  | ++                       |
| 5/11/2017                  | ++                       |
| 6/21/2017                  | ++                       |
| 12/8/2017                  | ++                       |
| 12/26/2017                 | +++                      |
| 1/7/2018                   | ++                       |

1063

1064 \*May include 1-2 days after because iBC-PC can be harvested each day for approximately 2 days and become iBCs  
1065 12-48 hours later in suspension.

1066 \*\*Differences in relative yield reflect experiment optimization changes. Experiments with +++ yield were so  
1067 abundant that late iBCs readily aggregated and complicated purification.

1068 **Table S1: Related to Figure 2**

1069 **iBC Generation Experiment Outcomes**

1070 iBC generation experiments over the course of this study with respect to initial iBC observation and relative  
1071 outcomes.

1072

1073

1074

1075

| LSM700              | Detector Gains | Hoechst | OCT4 | TROMA-I | LSM880              | Detector Gains | Hoechst | OCT4 | TROMA-I |
|---------------------|----------------|---------|------|---------|---------------------|----------------|---------|------|---------|
| iBC Control Setting |                | 339     | 748  | 406     | iBC Control Setting |                | 398     | 731  | 513     |
|                     |                |         |      |         |                     |                |         |      |         |
| Blastocyst-1        |                | 363     | 491  | 540     | Blastocyst-1        |                | 356     | 502  | 537     |
| Blastocyst-2        |                | 332     | 447  | 457     | Blastocyst-2        |                | 367     | 538  | 585     |
| Blastocyst-3        |                | 375     | 462  | 515     | Blastocyst-3        |                | 363     | 601  | 604     |
|                     |                |         |      |         |                     |                |         |      |         |
| LSM700              | Detector Gains | Hoechst | OCT4 | TROMA-I | LSM880              | Detector Gains | Hoechst | OCT4 | TROMA-I |
| iBC Control Setting |                | 361     | 552  | 463     | iBC Control Setting |                | 293     | 745  | 612     |
|                     |                |         |      |         |                     |                |         |      |         |
| Blastocyst-1        |                | 384     | 414  | 503     | Blastocyst-1        |                | 344     | 634  | 630     |
| Blastocyst-2        |                | 403     | 420  | 531     | Blastocyst-2        |                | 344     | 609  | 705     |
| Blastocyst-3        |                | 415     | 443  | 557     | Blastocyst-3        |                | 354     | 561  | 619     |
|                     |                |         |      |         |                     |                |         |      |         |

1076

1077 **Table S2: Related to Figure 3**

1078 **iBC vs BC Comparative Microscopy Results**

1079 iBC stained for DNA, OCT4, or TROMA-I detection are imaged on LSM700 and LSM800 microscopes (see methods).

1080 Three BCs are stained the same and imaged with matching microscope settings to determine detector gains (see

1081 methods).

1082

1083

1084

1085

1086

1087

1088

1089

1090

1091

1092

1093



1094 EB, mEpiSC Cluster, iBC, and Control Embryo (BC)  
 1095 Single Source and Co-Transfer Uterus Transfer Decidualization Experiments

| <b>Control Embryos Only</b>      | <b>Control Embryos</b> | <b>n/a</b>  | <b>Deciduae Observed</b> | <b># above control</b> | <b>Control Decidualization Frequency</b>   |
|----------------------------------|------------------------|-------------|--------------------------|------------------------|--------------------------------------------|
|                                  | 7                      | 0           | 6                        | 0                      | 86%                                        |
|                                  | 7                      | 0           | 0                        | 0                      | 0%                                         |
|                                  | 7                      | 0           | 7                        | 0                      | 100%                                       |
|                                  | 7                      | 0           | 3                        | 0                      | 43%                                        |
|                                  | 10                     | 0           | 10                       | 0                      | 100%                                       |
|                                  | 10                     | 0           | 10                       | 0                      | 100%                                       |
|                                  | 4                      | 0           | 0                        | 0                      | 0%                                         |
|                                  |                        |             |                          |                        |                                            |
| <b>iBCs Only</b>                 | <b>Control Embryos</b> | <b>iBCs</b> | <b>Deciduae Observed</b> | <b># above control</b> | <b>iBC Decidualization Frequency</b>       |
|                                  | 0                      | 10          | 0                        | 0                      | 0%                                         |
|                                  | 0                      | 10          | 6                        | 6                      | 60%                                        |
|                                  | 0                      | 10          | 0                        | 0                      | 0%                                         |
|                                  | 0                      | 10          | 0                        | 0                      | 0%                                         |
|                                  | 0                      | 10          | 1                        | 1                      | 10%                                        |
|                                  | 0                      | 8           | 0                        | 0                      | 0%                                         |
|                                  | 0                      | 10          | 2                        | 2                      | 20%                                        |
|                                  | 0                      | 11          | 0                        | 0                      | 0%                                         |
|                                  | 0                      | 10          | 0                        | 0                      | 0%                                         |
|                                  | 0                      | 10          | 0                        | 0                      | 0%                                         |
|                                  | 0                      | 10          | 0                        | 0                      | 0%                                         |
|                                  | 0                      | 10          | 1                        | 1                      | 10%                                        |
|                                  | 0                      | 10          | 0                        | 0                      | 0%                                         |
|                                  | 0                      | 10          | 0                        | 0                      | 0%                                         |
|                                  | 0                      | 10          | 0                        | 0                      | 0%                                         |
|                                  |                        |             |                          |                        |                                            |
| <b>iBC + Control Co-Transfer</b> | <b>Control Embryos</b> | <b>iBCs</b> | <b>Deciduae Observed</b> | <b># above control</b> | <b>Control Decidualization Frequency *</b> |
|                                  | 4                      | 8           | 5                        | 1                      | 125%                                       |
|                                  | 5                      | 5           | 7                        | 2                      | 140%                                       |
|                                  | 5                      | 5           | 0                        | 0                      | 0%                                         |
|                                  | 5                      | 5           | 4                        | 0                      | 80%                                        |
|                                  | 4                      | 7           | 5                        | 1                      | 125%                                       |
|                                  | 5                      | 5           | 8                        | 3                      | 160%                                       |
|                                  | 5                      | 5           | 6                        | 1                      | 120%                                       |
|                                  | 5                      | 5           | 5                        | 0                      | 100%                                       |
|                                  | 5                      | 6           | 4                        | 0                      | 80%                                        |
|                                  | 5                      | 6           | 6                        | 1                      | 120%                                       |
|                                  | 4                      | 8           | 4                        | 0                      | 100%                                       |
|                                  | 4                      | 9           | 0                        | 0                      | 0%                                         |
|                                  | 4                      | 10          | 5                        | 1                      | 125%                                       |
|                                  | 4                      | 8           | 6                        | 2                      | 150%                                       |
|                                  | 4                      | 8           | 5                        | 1                      | 125%                                       |
|                                  | 4                      | 8           | 5                        | 1                      | 125%                                       |
|                                  | 4                      | 8           | 5                        | 1                      | 125%                                       |
|                                  | 3                      | 7           | 4                        | 1                      | 133%                                       |
|                                  | 2                      | 8           | 0                        | 0                      | 0%                                         |

|                                             |                        |                        |                          |                        |                                            |
|---------------------------------------------|------------------------|------------------------|--------------------------|------------------------|--------------------------------------------|
|                                             | 4                      | 8                      | 7                        | 3                      | 175%                                       |
|                                             | 4                      | 7                      | 3                        | 0                      | 75%                                        |
|                                             | 4                      | 8                      | 8                        | 4                      | 200%                                       |
|                                             | 4                      | 8                      | 3                        | 0                      | 75%                                        |
|                                             | 4                      | 8                      | 3                        | 0                      | 75%                                        |
|                                             | 4                      | 8                      | 5                        | 1                      | 125%                                       |
|                                             | 4                      | 8                      | 3                        | 0                      | 75%                                        |
|                                             |                        |                        |                          |                        |                                            |
| <b>EB + Control Co-Transfer</b>             | <b>Control Embryos</b> | <b>EB</b>              | <b>Deciduae Observed</b> | <b># above control</b> | <b>Control Decidualization Frequency *</b> |
|                                             | 4                      | 8                      | 0                        | 0                      | 0%                                         |
|                                             | 4                      | 7                      | 0                        | 0                      | 0%                                         |
|                                             |                        |                        |                          |                        |                                            |
| <b>EB Only</b>                              | <b>Control Embryos</b> | <b>EB</b>              | <b>Deciduae Observed</b> | <b># above control</b> | <b>EB Decidualization Frequency</b>        |
|                                             | 0                      | 10                     | 0                        | 0                      | 0%                                         |
|                                             | 0                      | 7                      | 0                        | 0                      | 0%                                         |
|                                             | 0                      | 10                     | 0                        | 0                      | 0%                                         |
|                                             | 0                      | 10                     | 0                        | 0                      | 0%                                         |
|                                             |                        |                        |                          |                        |                                            |
| <b>mEpiSC Cluster + Control Co-Transfer</b> | <b>Control Embryos</b> | <b>mEpiSC Clusters</b> | <b>Deciduae Observed</b> | <b># above control</b> | <b>Control Decidualization Frequency *</b> |
|                                             | 4                      | 8                      | 2                        | 0                      | 50%                                        |
|                                             | 4                      | 8                      | 3                        | 0                      | 75%                                        |
|                                             | 4                      | 8                      | 4                        | 0                      | 100%                                       |
|                                             | 4                      | 8                      | 2                        | 0                      | 50%                                        |
|                                             |                        |                        |                          |                        |                                            |
| <b>mEpiSC Cluster Only</b>                  | <b>Control Embryos</b> | <b>mEpiSC Clusters</b> | <b>Deciduae Observed</b> | <b># above control</b> | <b>mEpiSC Decidualization Frequency</b>    |
|                                             | 0                      | 10                     | 0                        | 0                      | 0%                                         |
|                                             | 0                      | 10                     | 0                        | 0                      | 0%                                         |
|                                             | 0                      | 10                     | 0                        | 0                      | 0%                                         |
|                                             | 0                      | 10                     | 0                        | 0                      | 0%                                         |

1096  
 1097 \*Control Embryos are the positive control value. Calculations assume control embryo deciduae and maximal 100%  
 1098 result. Deciduae in excess of 100% obviate iBC contribution.

1099 **Table S3: Related to Figure 4**

1100 **EB, mEpiSC cluster, iBC, and BC Decidualization Experiments**

1101 Sterile-male bred pseudopregnant mice (PP2.5) surrogate transfer unit counts and subsequent dissected deciduae  
 1102 counts.

1103

1104

1105

1106

1107

1108 **METHODS**

| <b>REAGENT or RESOURCE</b>                           | <b>SOURCE</b>      | <b>IDENTIFIER</b> |
|------------------------------------------------------|--------------------|-------------------|
| <b>Antibodies</b>                                    |                    |                   |
| Mouse anti-Mouse OCT4 (C-10)                         | Santa Cruz Biotech | sc-5279           |
| Rat anti-Mouse TROMA-I (KRT8)                        | DSHB               | Troma-I           |
| Mouse anti-Mouse PL-I                                | Santa Cruz Biotech | sc-376436         |
| Rabbit anti-Mouse TPBPA                              | Abcam              | ab104401          |
| Mouse anti-Mouse YAP                                 | Santa Cruz Biotech | sc-101199         |
| Rabbit anti-Mouse CDX2                               | Abcam              | ab76541           |
| Rabbit anti-Mouse CDX2                               | Hitoshi Niwa Lab   |                   |
| Mouse anti-Mouse NANOG                               | BD Pharmingen      | 560259            |
| Donkey anti-Mouse Alexa Fluor 488                    | Thermo Fisher      | A-21202           |
| Donkey anti-Mouse Alexa Fluor 555                    | Thermo Fisher      | A-31570           |
| Donkey anti-Mouse Alexa Fluor 647                    | Thermo Fisher      | A-31571           |
| Donkey anti-Rabbit Alexa Fluor 546                   | Thermo Fisher      | A-10040           |
| Donkey anti-Rat Alexa Fluor 647                      | Jackson ImmunoRes. | 712-605-150       |
| Goat anti-Rat Alexa Fluor 555                        | Thermo Fisher      | A-21434           |
| Goat anti-Rat Alexa Fluor 647                        | Thermo Fisher      | A-21247           |
| Goat anti-Mouse Alexa Fluor 488                      | Thermo Fisher      | A-11029           |
| Goat anti-Mouse Alexa Fluor 647                      | Thermo Fisher      | A-21236           |
| Goat anti-Rabbit Alexa Fluor 488                     | Thermo Fisher      | A-11008           |
| Goat anti-Rabbit Alexa Fluor 488 (preadsorbed)       | Abcam              | ab150081          |
| Donkey anti-Mouse Alexa Fluor 647 (preadsorbed)      | Abcam              | ab150111          |
|                                                      |                    |                   |
| <b>Chemicals, Peptides, and Recombinant Proteins</b> |                    |                   |
| Recombinant BMP4                                     | RnD Systems        | 314-BP-010        |
| Recombinant Activin A                                | RnD Systems        | 338-AC-010        |

|                                                                                                     |                   |                  |
|-----------------------------------------------------------------------------------------------------|-------------------|------------------|
| Recombinant bFGF                                                                                    | Wako              | 064-05381        |
| 2S-OMPT                                                                                             | Avanti Lipids     | 857235P          |
| SB431542                                                                                            | Selleckchem       | S1067            |
| ESGRO LIF                                                                                           | Millipore         | ESG1106          |
| L-Ascorbic Acid 2-Phosphate                                                                         | Sigma             | A8960-5G         |
| Fibronectin from Bovine Plasma Solution                                                             | Sigma             | F1141-2MG        |
| CHIR99021                                                                                           | SelleckChem       | S2924            |
| PD0325901                                                                                           | SelleckChem       | S1036            |
| DMEM/F12 Glutamax Medium                                                                            | Life Technologies | 10565-018        |
| Neurobasal Medium                                                                                   | Life Technologies | 21103-049        |
| N-2 Supplement                                                                                      | Life Technologies | 17502-048        |
| B-27 Supplement                                                                                     | Life Technologies | 17504-044        |
| 100X Glutamax Supplement                                                                            | Life Technologies | 35050-061        |
| 7.5% BSA Frac V                                                                                     | Life Technologies | 15260-037        |
| NDiff227 Medium                                                                                     | Clontech/Takara   | Y40002           |
| 1000X 2-Mercaptoethanol                                                                             | Life Technologies | 21985-023        |
| PBS (Ca/Mg free)                                                                                    | Life Technologies | 14190-094        |
| 100X Penicillin / Streptomycin                                                                      | Thermo Fisher     | 15140-122        |
| KnockOut DMEM                                                                                       | Thermo Fisher     | 10829018         |
| KnockOut Serum Replacement                                                                          | Thermo Fisher     | 10828028         |
| MEM Non-Essential Amino Acids Solution (100X)                                                       | Thermo Fisher     | 11140050         |
| iMatrix 511                                                                                         | Nippi             | 892011           |
|                                                                                                     |                   |                  |
| <b>Experimental Models: Cell Lines</b>                                                              |                   |                  |
| XGFP mEpiSC (Female); Tg(CAG-EGFP)D4Nagy; 129X1/SvJ x 129S1/Sv)F1-Kitl                              | Azim Surani Lab   | Bao et al., 2009 |
| XGFP mEpiSC (Female); Tg(CAG-EGFP)D4Nagy; 129X1/SvJ x 129S1/Sv)F1-Kitl; Piggybac EOS::mCherry (RFP) | This Paper        |                  |

|                                                                                                                        |                     |                      |
|------------------------------------------------------------------------------------------------------------------------|---------------------|----------------------|
| XGFP mEpiSC (Female); Tg(CAG-EGFP)D4Nagy; 129X1/SvJ x 129S1/Sv)F1-Kitl; Piggybac <i>EOS::DSRED</i> (RFP)               | This Paper          |                      |
| XGFP mEpiSC (Female); Tg(CAG-EGFP)D4Nagy; 129X1/SvJ x 129S1/Sv)F1-Kitl; Piggybac <i>EOS::D2-3xNLS-mCherry</i> (D2nRFP) | This Paper          |                      |
| XGFP mEpiSC (Female); Tg(CAG-EGFP)D4Nagy; 129X1/SvJ x 129S1/Sv)F1-Kitl; Piggybac <i>MERVL::DSRED</i>                   | This Paper          |                      |
| XGFP mEpiSC (Female); Tg(CAG-EGFP)D4Nagy; 129X1/SvJ x 129S1/Sv)F1-Kitl; Piggybac <i>MERVL::mCherry</i>                 | This Paper          |                      |
| mEpiSC (Female)                                                                                                        | Satoshi Ohtsuka Lab | Ohtsuka et al., 2012 |
| mEpiSC                                                                                                                 | Paul Tesar Lab      | Tesar et al., 2007   |
| mEpiSC, miRNA reporter GFP/RFP line                                                                                    | Robert Blelloch Lab | Parchem et al., 2014 |
|                                                                                                                        |                     |                      |
| <b>Experimental Models: Organisms/Strains</b>                                                                          |                     |                      |
| CD-1 (ICR) Surrogate Mice (Female)                                                                                     | RIKEN CDB Large     |                      |
| CD-1 (ICR) Blastocysts (mixed gender)                                                                                  | RIKEN CDB Large     |                      |
| R26-H2B-EGFP Blastocysts (mixed gender)                                                                                | RIKEN CDB Large     | CDB0238K             |
|                                                                                                                        |                     |                      |
| <b>Oligonucleotides</b>                                                                                                |                     |                      |
| Taqman probe, Mouse Gapdh                                                                                              | Applied Biosystems  | Mm99999915_g1        |
| Taqman probe, Mouse Pou5f1 (Oct4)                                                                                      | Applied Biosystems  | Mm03053917_g1        |
| Taqman probe, Mouse Nanog                                                                                              | Applied Biosystems  | Mm02019550_s1        |
| Taqman probe, Mouse Troma-1 (Krt8)                                                                                     | Applied Biosystems  | Mm04209403_g1        |
| Taqman probe, Mouse Atp1b1                                                                                             | Applied Biosystems  | Mm00437612_m1        |
| Taqman probe, Mouse Cdx2                                                                                               | Applied Biosystems  | Mm01212280_m1        |
| Taqman probe, Mouse Bmp4                                                                                               | Applied Biosystems  | Mm00432087_m1        |
| Taqman probe, Mouse Lifr                                                                                               | Applied Biosystems  | Mm00442942_m1        |
| Taqman probe, Mouse Gata3                                                                                              | Applied Biosystems  | Mm00484683_m1        |
| Taqman probe, Mouse Prdm14                                                                                             | Applied Biosystems  | Mm01237814_m1        |
| Taqman probe, Mouse Prdm1 (Blimp1)                                                                                     | Applied Biosystems  | Mm00476128_m1        |
| Taqman probe, Mouse Id1                                                                                                | Applied Biosystems  | Mm00775963_g1        |

|                                                 |                                   |                                                                                                                                         |
|-------------------------------------------------|-----------------------------------|-----------------------------------------------------------------------------------------------------------------------------------------|
| Taqman probe, Mouse Id2                         | Applied Biosystems                | Mm00711781_m1                                                                                                                           |
| Taqman probe, Mouse Id3                         | Applied Biosystems                | Mm00492575_m1                                                                                                                           |
| Taqman probe, Mouse Id4                         | Applied Biosystems                | Mm00499701_m1                                                                                                                           |
| Taqman probe, Mouse Zscan4                      | Applied Biosystems                | Mm02581232_m1                                                                                                                           |
| Taqman probe, Mouse Eomes                       | Applied Biosystems                | Mm01351984_m1                                                                                                                           |
| Taqman probe, Mouse TdGF1 (Cripto)              | Applied Biosystems                | Mm03024051_g1                                                                                                                           |
| Taqman probe, Mouse Cdh1 (Ecadherin)            | Applied Biosystems                | Mm01247357_m1                                                                                                                           |
| Taqman probe, Mouse Gata4                       | Applied Biosystems                | Mm00484689_m1                                                                                                                           |
| Taqman probe, Mouse Sox2                        | Applied Biosystems                | Mm03053810_s1                                                                                                                           |
| Taqman probe, Mouse Sox17                       | Applied Biosystems                | Mm00488363_m1                                                                                                                           |
| Taqman probe, Mouse Zfp42 (Rex1)                | Applied Biosystems                | Mm03053975_g1                                                                                                                           |
|                                                 |                                   |                                                                                                                                         |
| <b>Recombinant DNA</b>                          |                                   |                                                                                                                                         |
| 2C MERVL reporter DNA element (742bp) subcloned | Addgene                           | Plasmid #40281                                                                                                                          |
| EOS reporter DNA element (907bp) subcloned      | Addgene                           | Plasmid #21314                                                                                                                          |
| Piggybac Transposon System                      | SBI                               |                                                                                                                                         |
|                                                 |                                   |                                                                                                                                         |
| <b>Software and Algorithms</b>                  |                                   |                                                                                                                                         |
| Expression Suite Software V1.1                  | Applied Biosystems                |                                                                                                                                         |
| Cluster 3.0 and Treeview 1.60                   | Michael Eisen,<br>Michiel de Hoon | <a href="http://bonsai.hgc.jp/~md_ehoon/software/cluster/software.htm">http://bonsai.hgc.jp/~md_ehoon/software/cluster/software.htm</a> |
| Zeiss Zen Software                              | Zeiss                             | <a href="http://www.zeiss.com">http://www.zeiss.com</a>                                                                                 |
| FIJI / Image J                                  | NIH                               | <a href="https://fiji.sc">https://fiji.sc</a>                                                                                           |
| GIMP 2.8                                        | GIMP Developers                   | <a href="https://www.gimp.org">https://www.gimp.org</a>                                                                                 |
| Volocity 3D Visualisation                       | Perkin Elmer                      |                                                                                                                                         |
| AVS Video Editor                                | AVS                               | <a href="http://www.avs4you.com">http://www.avs4you.com</a>                                                                             |
|                                                 |                                   |                                                                                                                                         |

| <b>Other</b>                                                               |                   |                 |
|----------------------------------------------------------------------------|-------------------|-----------------|
| Ambion Nuclease Free Water                                                 | Thermo Fisher     | AM9939          |
| Taqman Gene Expression Cells to CT Kit                                     | Thermo Fisher     | 4399002         |
| Taqman Gene Expression Mastermix                                           | Thermo Fisher     | 4369016         |
| Taqman Fast Universal PCR Mastermix (2x)                                   | Thermo Fisher     | 4352042         |
| TRIzol                                                                     | Thermo Fisher     | 15596026        |
| QIAzol                                                                     | Qiagen            | 79306           |
| Superscript Reverse Transcriptase III FS Kit                               | Thermo Fisher     | 18080051        |
| Ambion RNASecure                                                           | Thermo Fisher     | AM7010          |
| Tissue Tek OCT Compound                                                    | Fisher Scientific | 50-363-579      |
| Pierce 16% Formaldehyde (w/v)                                              | Thermo Fisher     | 28908           |
| Horse Serum, Heat Inactivated                                              | Thermo Fisher     | 26050070        |
| Polyvinylpyrrolidone                                                       | Sigma             | P2307-100G      |
| Fluorsave (Calbiochem)                                                     | Millipore         | 345789          |
| Accutase                                                                   | Millipore         | SCR005          |
| Embryo TransferPipettes, 0.290-0.310mm                                     | Vitrolife         | 14319           |
| Hydrocell 3.5cm Low Attachment Dish                                        | CellSeed          | CS2005          |
| QIAmp DNA Micro Kit                                                        | Qiagen            | 56304           |
| Costar 24 Well Clear Flat Bottom Ultra Low Attachment Multiple Well Plates | Corning           | 3473            |
| Falcon 6 Well Clear Flat Bottom TC-Treated Multiwell Cell Culture Plate    | Corning           | 353046          |
| Nunclon Sphera Round Bottom 96 Well Super Low Attachment Microplate        | Thermo Fisher     | 174925          |
| Zeiss PALM Adhesive Cap 500uL Tubes                                        | Zeiss             | 415190-9211-000 |
|                                                                            |                   |                 |

1109

1110 **Contact for Reagent and Resource Sharing**

1111 Further information and requests for reagents can be directed to Cody Kime (cody.kime@riken.jp). MTAs required.

1112 **Experimental Model Details**

1113 **Animal Use**

1114 Mouse handling and experiments were carried out with humane methods approved by RIKEN Kobe Safety Center.  
1115 Sterile-male bred pseudopregnant surrogate CD-1 (ICR) female mice were prepared at PP2.5 and then control BCs,  
1116 iBCs, mEpiSC clusters, or EBs were transferred to the uterus using standard embryo IVF pipetting techniques. CD-1  
1117 (ICR) BCs and R26-H2B-EGFP BCs were used for control BC experiments (Abe et al., 2011).

#### 1118 **mEpiSC Culture**

1119 mEpiSC Culture Media (MCM): NDiff227 supplemented with 20 ng/mL ActivinA, 12 ng/mL bFGF, and 1:100  
1120 penicillin/streptomycin. Media and supplements were stored separately at -20 °C in aliquots and thawed fresh at  
1121 least every 4 days and stored at 4 °C. mEpiSC were cultured on plates coated for 1 hour at room temperature with  
1122 1:100 Fibronectin:PBS. Medium was changed daily, and cells were passaged as small clumps every 2–3 days at  
1123 ~1:10–20, never exceeding 30% confluent. Cell colonies remained less than 200–300 µm wide and largely  
1124 resembled homogenous mEpiSC colonies with few single cells. Cell passage was carried out, in brief, with PBS  
1125 wash, fresh Accutase for 55 seconds, PBS wash, 2 mL of MCM, scraped, triturated 6–8 times in a conical vial, then  
1126 dispersed ~1:10–20 in MCM. If cells exhibited signs of differentiation the culture was discarded and replaced by a  
1127 freshly thawed stock.

#### 1128 **Method Details**

##### 1129 **CTSFES Media Preparation for Working Media**

1130 *CTSFES Basal Media ~1L Preparation*: [500 mL DMEM:F12+Glutamax, 500 mL Neurobasal Media, 10 mL B27  
1131 Supplement, 5 mL N2 Supplement, 5 mL Glutamax Supplement, 670 µL 7.5% BSA Frac V Solution]; filtered at 0.22  
1132 µm, aliquoted, and stored immediately at -20 °C; thawed overnight at 4 °C and used for 1–8 days.

1133 *CTSFES 'Working Medium' after thawing for experimental use*: Add 1:100 penicillin/streptomycin, 1:1000 2-ME, 64  
1134 µg/mL ascorbic acid 2-phosphate.

##### 1135 **mEpiSC Preparation for Naive Conversion or iBC Generation**

1136 Target wells of 6W plate were coated with 1.5 mL 1:100 Fibronectin:PBS substrate for 1 hour at room temperature.  
1137 Stock cultures of near-passage mEpiSC colonies were sourced for passage into conversion experiment as follows:  
1138 PBS wash, freshly thawed room temperature Accutase for 1 minute, Accutase gently aspirated, washed again with  
1139 equal volume of PBS while tapping the plate to release single-cells, PBS wash gently aspirated, 37 °C prewarmed  
1140 fresh Accutase was added and incubated at 37 °C for 5–7 minutes until cells floated and dispersed freely. 5X  
1141 volume 1:1 PBS:MCM was added and the volume triturated 10–20 times in 15 mL conical vial. Cells were  
1142 centrifuged at 200xG for 3 minutes. mEpiSC pellet was resuspend in 1–2 mL of MCM and live cells were counted.  
1143 Cells were diluted in MCM to yield ~20,000 cells/1.5 mL for naive conversions or 30–50,000 cells/1.5 mL for iBC  
1144 generation, mixed evenly. Fibronectin:PBS coating was aspirated from target plates and 1.5 mL of diluted cells in  
1145 MCM were added per well. Cells were incubated at 37 °C for 14–16 hours before conversion media is added;  
1146 plates were often checked 2–3 hours after plating to ensure cells plated as single evenly dispersed cells.

##### 1147 **Naive Conversion Experiment**

1148 *Naive Conversion Experiment Media(NCM) (8 days of changes)*: Working Medium + [10 ng/mL BMP4, 1000  
1149 units/mL ESGRO LIF, and 1 µM OMPT; prepared fresh at least every 4 days.

1150 6W wells plated with ~20,000 mEpiSC cells/well were fed 2 mL of NCM daily starting ~14–16 hours after cells were  
1151 plated with the preparation noted prior in these methods.

##### 1152 **iBC Generation Experiment**

1153 *iBC Generation Media Phase 1, Day 0–3 Media (4 changes)*: Working Medium + [10 ng/mL BMP4 and 1 µM  
1154 SB43152]; prepared fresh on Day 0, and SB43152 is increased to 3µM for Days1-3.



1155 *iBC Generation Media Phase 2, Day 4–6 Media (3 changes):* Working Medium + [5 ng/mL BMP4, + 500–1000  
1156 units/mL ESGRO LIF, and 0.5–1  $\mu$ M OMPT]; prepared fresh on Day 4.

1157 6W wells plated with 30–50,000 mEpiSC cells/well were fed 2 mL of Phase 1 Medium daily at a similar time,  
1158 starting 14–16 hours after cells were plated with the preparation noted prior in these methods. From Day 4, 2 mL  
1159 of Phase 2 medium was changed daily. On Day 6 and Day 7, iBC-PCs and some emerging iBCs were collected with  
1160 ART P1000G Wide Bore Pipette tips. iBC Generation Plate was leaned at a 45° angle, and the upper 1 mL (primary)  
1161 was harvested to one well of a 24-well ULA Plate; the lower 1 mL (secondary) was drawn up and cascaded over the  
1162 plate once and then harvested to a separate well of a 24-well ULA Plate. 2 mL of Phase 2 medium was replaced on  
1163 the plate if the culture was observed or used later. *Some iBC experiments included 0.2  $\mu$ M sodium pyruvate. In a*  
1164 *few experiments, SB431542 was varied between 1 and 10  $\mu$ M, and Phase 1 and Phase 2 media were mixed 1:1 on*  
1165 *Days 3, 4, or 5.*

1166 Primary and secondary harvests from one 6W well of iBC generation were considered together, although  
1167 secondary harvests contained more iBC-PCs, iBCs, and cell debris. Early on Day 7, primary and secondary harvests  
1168 were observed for brief periods, and the emergence of morula-like structures and early blastocyst-like structures  
1169 from iBC-PCs was noted on the 24W ULA plate lid. Working medium or Phase 2 medium was placed in a Hydrocell  
1170 3.5-cm plate and incubated for 1 hour at 37 °C. iBCs were judged by morphology for blastocyst-like characteristics  
1171 and isolated by embryo transfer pipette to the Hydrocell 3.5-cm plate and incubated for 1–3 hours at 37 °C. The  
1172 Hydrocell 3.5-cm plate of near-completely purified iBCs were then sourced for analysis or IVF transfer into PP2.5  
1173 sterile-male bred pseudopregnant mice. When iBCs were transferred to pseudopregnant mice, they were washed  
1174 3 times by transfer into separate drops of standard embryo transfer medium. In such transfers, unique glass  
1175 pipettes were used between each step to ensure sample handling was accurate.

#### 1176 **iBC/iBC-PC Outgrowth Experiments**

1177 6-well plates were coated with iMatrix511 and then plated with feeder cells and incubated overnight. The feeders  
1178 were evenly plated and freshly prepared 2iLIF or CDM-FAXY was changed in at 1 mL/well from medias prepared as  
1179 follows:

1180 **2iLIF:** 200 mL CTSFES Basal Media + additional 1.2 mL 7.5% BSA Frac V Solution, 1000 units/mL ESGRO LIF, 3  $\mu$ M  
1181 CHIR99021, and 1  $\mu$ M PD0325901, prepared fresh every 4 days.

1182 **CDM-FAXY:** 200 mL of CTSFES Basal Media + 1.2 mL 7.5% BSA Frac V Solution, with supplements as published  
1183 previously (Ohinata and Tsukiyama, 2014) except with 1:1000 2-ME in place of monothioglycerol.

1184 iBC and iBC-PC were purified by pipette and combined. The combined structures were pipetted against the  
1185 bottom of the tube to break them up and then plated in the wells of 2iLIF or CDM-FAXY media, changed every  
1186 other day. After one week, plates were replated in their respective medias on fresh feeders on 6-well plates coated  
1187 with iMatrix511. 2iLIF cultures were then fed media daily with cell passage thereafter on iMatrix511 coated plates  
1188 without feeders. CDM-FAXY cultures were fed every other day, replated once more onto iMatrix511 coated plates  
1189 without feeders and then twice thereafter on fibronectin coated plates.

#### 1190 **Embryoid Body Formation Experiment**

1191 *EB Medium ~100 mL:* [80 mL KnockOut DMEM, 20 mL KnockOut Serum Replacement, 1:1000 2-ME, 1 mL Non-  
1192 Essential Amino Acids Solution, 1 mL Glutamax, 1:100 penicillin/streptomycin]; prepared fresh.

1193 mEpiSC were prepared as single cells as in preparation for Naive Conversion or iBC Generation until pelleted. The  
1194 pellet was resuspended in 1 mL of EB Medium, and live cells were counted. Cells were plated at 100  $\mu$ L/well in 96-  
1195 Well Nunclon Sphera Super Low Attachment Microplates, at 500, 1000, or 2000 cells/well and incubated at 37 °C.  
1196 On Day 4, 100  $\mu$ L of additional EB medium was added per well. EBs were collected on Day 8, and smaller sized and

1197 evenly formed EBs were sourced for IVF transfer into PP2.5 sterile-male bred pseudopregnant mice. When EBs  
1198 were transferred to pseudopregnant mice, they were washed 3 times by transfer into separate drops of standard  
1199 embryo-transfer medium.

#### 1200 **Mouse Decidua Dissection and Cryosectioning**

1201 Surrogate mice were sacrificed humanely by standard protocol at E5.5–E9.5, as estimated by transfer timing at  
1202 PP2.5. Mice were viewed from ventral side and the abdominal area was dissected to present the uterus horns to  
1203 the fore and posterior of the mouse. Distinct deciduae were counted and noted on mouse cards and dissections  
1204 were imaged with Sony Xperia 3 S0-01G. When deciduae were desired for cryosection, they were dissected from  
1205 uterine tissue to individual deciduae, washed in DPBS, and then fixed overnight in paraformaldehyde at 4 °C. Fixed  
1206 deciduae were washed with PBS and then gradually desiccated with 30% Sucrose/PBS solution overnight at 4 °C  
1207 and then washed and placed in OCT Compound. Deciduae from one uterus horn were pooled into one sectioning  
1208 mold, labeled, and stored at -80 °C in OCT compound. OCT compound molds of deciduae were later placed in the  
1209 Microm HM560 microtome at -20 °C and sections are cut at 10–30 μM thickness and placed on slide glass, dried  
1210 for 1–2 hours under room temperature blown air, dried 1 hour at 37 °C, then stored at -30 °C in sealed slide  
1211 containers until later use. Figure S4C sections were cut at 5 μM thickness.

#### 1212 **Hematoxylin and Eosin (H&E) Staining**

1213 Previously prepared cryosections of deciduae were thawed from frozen slides and rinsed in PBS, stained with  
1214 hematoxylin for 5 minutes, eosin for 2 minutes, and then washed with increasing mixed alcohol concentrations  
1215 and then xylene before finalization in malinol with coverslips sealed by nail polish.

#### 1216 **Fluorescence Imaging and Confocal Microscopy**

1217 Immunocytochemistry in Figure 1 A,B, and Figure S1A was carried out by fixation with paraformaldehyde and then  
1218 blocking and staining in 5% BSA/PBS with mouse anti-mouse Nanog 1:200; then donkey anti-mouse Alexa Fluor  
1219 555 1:200, followed by Hoechst 33342 1:1000; imaged in PBS with Zeiss LSM 510 Confocal Microscope. Z-stack  
1220 images from these samples were used for Supplemental Video 1 by visualization in Velocity software, exported to  
1221 video and labeled with AVS Video Editor which processed the 16:9 aspect ratio and reduced data size. Figure 1C  
1222 was prepared using the same methods with 3 μg/mL of rat anti-mouse TROMA-I and mouse anti-mouse Nanog  
1223 1:200; then goat anti-rat Alexa Fluor 555 1:500 and donkey anti-mouse Alexa Fluor 647 (Thermo) 1:500, followed  
1224 by Hoechst 33342 1:1000.

1225 Live-cell XGFP fluorescence was imaged in Figure 1D Zeiss Z1 microscope.

1226 DNA stain and imaging in Figure S2B were carried out by fixation with paraformaldehyde, permeabilization in 0.2%  
1227 Triton X-100, and blocking and staining in 2% FBS/PBS; Hoechst 33342 1:2000, and imaged in 20% glycerol/PBS  
1228 suspension slide with Olympus Confocal Microscope (CSU-X1).

1229 Immunocytochemistry in Figure 2D,E, Figure 3B,C was carried out by washing BCs or iBCs or iBC-PCs in 3 mg/mL  
1230 polyvinylpyrrolidone in PBS, fixation with paraformaldehyde, permeabilization in 0.25% Triton X-100, and blocking  
1231 and staining in 4% horse serum/PBS. Figure 2D,E samples were stained with 1:100 mouse anti-mouse YAP; then  
1232 1:500 goat anti-mouse Alexa Fluor 647. Figure 3B samples were stained 1:100 mouse anti-mouse YAP and 1:100  
1233 rabbit anti-mouse CDX2(Abcam); then 1:500 goat anti-mouse Alexa Fluor 647 and 1:500 goat anti-rabbit Alexa  
1234 Fluor 488 (Thermo). Figure 3C samples were stained with 3.6 μg/mL rat anti-mouse TROMA-I and mouse anti-  
1235 mouse OCT4 1:200; then goat anti-mouse Alexa Fluor 488 1:500 and goat anti-rat Alexa Fluor 647 1:500. All  
1236 samples were followed by Hoechst 33342 stain 1:1000-2000 and imaged in 20% glycerol/PBS suspension slide with  
1237 Zeiss LSM 700 or 880 Confocal Microscopes. Samples were washed with blocking buffer ~3 times between fixing  
1238 and staining stages.

1239 IHC in Figure 5B was carried out by thawing previously cryosectioned deciduae slides, washing with PBS,  
1240 permeabilization with 0.2% Triton X-100, and then blocking and staining in either 2% BSA/PBS or 4% horse  
1241 serum/PBS with 1.8–9 µg/mL rat anti-mouse TROMA-I; then donkey anti-rat Alexa Fluor 647 1:250–500, followed  
1242 by Hoechst 33342 1:2000, sealed in Fluorsave and imaged with Zeiss LSM 700 Confocal Microscope.

1243 Immunocytochemistry in Figure 6C was prepared by fixation with paraformaldehyde, permeabilization in 0.25%  
1244 Triton X-100, and blocking and staining in 4% horse serum/PBS. Antibodies were used in separate stains:  
1245 1:100 mouse anti-mouse OCT4; then 1:500 goat anti-mouse Alexa Fluor 647.  
1246 1:100 mouse anti-mouse NANOG, then 1:500 goat anti-mouse Alexa Fluor 647.  
1247 1:100 mouse anti-mouse YAP, then 1:500 goat anti-mouse Alexa Fluor 647.  
1248 All staining was followed by Hoechst 33342 1:2000 and imaged with Zeiss LSM 700 Confocal Microscope. Samples  
1249 were washed with blocking buffer ~3 times between fixing and staining stages.

1250 Immunocytochemistry of TE-like cells in Figure 6C was prepared by fixation with paraformaldehyde,  
1251 permeabilization in 0.2% Triton X-100, and blocking and staining in 4% horse serum/PBS with rabbit anti-mouse  
1252 CDX2 (gift from Hitoshi Niwa lab) 1:1000; then goat anti-rabbit Alexa Fluor 488 (Thermo) 1:500, followed by  
1253 Hoechst 33342 1:2000 and imaged in PBS with Zeiss LSM 700 Confocal Microscope. Sample was washed with  
1254 blocking buffer ~3 times between fixing and staining stages.

1255 IHC in Figure S4C was carried out by thawing previously cryosectioned deciduae slides, air dried, washing with PBS,  
1256 permeabilization with 0.1% Triton X-100, and then blocking in 2.5% skim milk for 30 min. The blocked sections  
1257 were stained separately as follows:  
1258 1:100 mouse anti-mouse PL-I; then 1:1000 donkey anti-mouse Alexa Fluor 647 (Abcam).  
1259 1:100 rabbit anti-mouse TPBPA; then 1:1000 goat anti-rabbit Alexa Fluor 488 (Abcam).  
1260 All staining was followed by DAPI for nuclear DNA visualization and imaged on both the LSM 700 Confocal  
1261 Microscope and Keyence BZ-X700. Samples were washed with blocking buffer ~3 times between fixing and staining  
1262 stages.

1263 Live cell RFP and GFP fluorescence was imaged in Figure 3D, Figure 7D,E,F,G, Figure S1B, Figure S2E, and Figure  
1264 S5A,B, with a Olympus IX71 Microscope.

1265 Immunocytochemistry in Figure S5B was prepared by fixation with paraformaldehyde, permeabilization in 0.25%  
1266 Triton X-100, and blocking and staining in 4% horse serum/PBS. Antibodies were used in separate stains:  
1267 1:100 mouse anti-mouse PL-I; then 1:500 donkey anti-mouse Alexa Fluor 488.  
1268 1:100 rabbit anti-mouse TPBPA, then 1:500 donkey anti-rabbit Alexa Fluor 546.  
1269 All staining was followed by Hoechst 33342 1:2000 and imaged with Zeiss LSM 700 Confocal Microscope. Samples  
1270 were washed with blocking buffer ~3 times between fixing and staining stages.

1271 **Comparative Microscopy**

1272 Zeiss LSM700 and LSM880 confocal microscopes were used as indicated in Table S2. For each iBC sample, channel  
1273 laser intensities, pinhole, and objective were selected to produce a clear image. The channel\_gains were  
1274 determined manually by setting each channel with range indicators and increasing gain until few target pixels  
1275 saturated the signal, and then the image was captured. For comparison, three BCs prepared with identical  
1276 methods were imaged with the same microscope, laser intensity, pinhole, and objective settings as the compared  
1277 iBC image. The channel gains were determined manually by the same method of using the range indicator setting  
1278 and increasing the gain until few target pixels saturated the signal, and then the image was captured.

1279 **Light Microscopy**

1280 Bright field and phase contrast microscopy were carried out on several microscope models. When accompanied by  
1281 or prepared as composite in fluorescent images, the same microscope was used. For all others, imaging was  
1282 carried out as follows: Figure S2A images were taken with Olympus CKX41 Microscope. Figure 2B,C, Figure 3D,  
1283 Figure 6C (left panel), Figure 7B,D,E,F,G, Figure S1B, Figure S2E,G, Figure S5A,B, were taken with Olympus IX71  
1284 Microscope.

1285 H&E Stained cryosection slides in Figure 5A,C, Figure S3, Figure S4A,B, were imaged with Olympus IX71 Microscope

1286 Sony Xperia 3 S0-01G was used for Figure 4B.

1287 Zeiss Laser Palm Microbeam was used for imaging Figure S4A(right panels).

1288 **Recombinant DNA Preparation**

1289 We prepared RFP as DSRED, mCherry, and also a modified mCherry under the *EOS* reporter by adding a mouse  
1290 ornithine decarboxylase destabilization domain(D2) and nuclear localization tags to the RFP(*EOS::D2nRFP*; Li et al.,  
1291 1998). D2 drastically reduces the half-life of the D2nRFP, providing timely live RFP responsiveness to mRNA level  
1292 changes: the D2nRFP signal more closely represents Oct4/Sox2 heterodimer transcriptional activity. We also  
1293 cloned RFP under the 2C *MERVL* reporter promoter. All reporter systems were cloned in piggybac vector systems  
1294 with 5' and 3' insulators.

1295 **Laser Capture Microdissection and gDNA PCR**

1296 Unique primers for hygromycin resistance transgene were designed using NCBI Primer Blast web software and  
1297 optimal primers were selected. Jackson Labs (JAX) universal mouse genomic DNA primers were also used for  
1298 control PCR. H&E stained cryosection samples of interest were prepared using standard slide cover removal  
1299 techniques and then automated LCM with the Zeiss PALM Microbeam with close cut parameters. Selected tissues  
1300 were collected with adhesive cap, 500  $\mu$ l tubes. Genomic DNA was purified from collected tissues using the Zeiss  
1301 PALM Protocols DNA Handling manual page 21 with a QIAmp DNA Micro Kit, eluting in 20ul of nuclease free water.  
1302 5  $\mu$ l of purified sample was used in 25  $\mu$ l PCR reactions with touchdown thermocycling using the following DNA  
1303 oligonucleotide primers:

1304 JAX Universal Mouse Forward: CTAGGCCACAGAATTGAAAGATCT

1305 JAX Universal Mouse Reverse: GTAGGTGGAAATTCTAGCATCATCC

1306 HygR Primer Set 2 Forward: GCTCAGGCACTGGATGAACT

1307 HygR Primer Set 2 Reverse: CAGCCAGTTCTGGGTGTCTT

1308 12.5  $\mu$ l of PCR reactions were run in agarose gel electrophoresis and stained with ethidium bromide and remaining  
1309 PCR sample was stocked as preamplified DNA. Samples used in Figures 4D were prepared by reamplification of  
1310 1:200 diluted preamplified DNA using target primer sets; 12.5  $\mu$ l of that secondary reamplified reaction was run in  
1311 2.5% agarose gel electrophoresis.

1312

1313 **Quantification and Statistical Analysis**

1314 **RT-qPCR Experiments**

1315 For Figure 3A and Figure 7A: 3 BCs, 6 iBCs, and 3 mEpiSC colonies were isolated with unique embryo pipettes and  
1316 washed with CMF-DPBS and carried through standard Ambion Cells-to-CT protocol including optional DNase I  
1317 treatment. 50  $\mu$ l of sample lysate was used for a 125  $\mu$ l reverse transcription reaction, then diluted to 140  $\mu$ l with  
1318 nuclease free water. RT-qPCR was prepared for each sample in duplicate with TaqMan probes using 4  $\mu$ l of sample  
1319 cDNA in 20  $\mu$ l reactions using TaqMan Gene Expression Mastermix. Detection was prepared on StepOne Plus under  
1320 standard cycling conditions with *Gapdh* samples on each plate. Plate data was analyzed with Applied Biosystems

1321 Expression Suite v1.1. Figure S2C experiments were performed similarly, except using earlier stage iBCs and BCs,  
1322 and diluting 113  $\mu$ l of the reverse transcription reaction product with 40  $\mu$ l of nuclease free water to ensure  
1323 enough overage for RT-qPCR.

1324 For Figure 6B: iBC/iBC-PC derived outgrowths in 2iLIF media were cultured and passaged as neat colonies.  
1325 C57BL/6N-CJL mouse ES cells were cultured similarly in 2iLIF media for positive control, and XGFP mEpiSC were  
1326 cultured in MCM for negative control. Biological replicates of each culture were sourced for total RNA via QIAzol  
1327 purification methods and finalized in 40  $\mu$ l of nuclease free water. cDNA was prepared from total RNAs using  
1328 Superscript Reverse Transcriptase III FS Kit with Random Hexamers protocol. RT-qPCR was carried out in 20  $\mu$ l  
1329 reactions with 2  $\mu$ l of cDNA of each sample in triplicate for all TaqMan probes with standard fast reaction protocols  
1330 in TaqMan Universal Fast Mastermix on StepOne Plus. Plate data was analyzed with Applied Biosystems Expression  
1331 Suite v1.1 and expression data was visualized in Microsoft Excel.

1332 For Figure 7C: iBC generation and control cell cultures were washed with PBS then total RNA was prepared with  
1333 QIAzol standard techniques finalized in Ambion Nuclease Free Water. cDNA was prepared from total RNA using  
1334 Superscript Reverse Transcriptase III FS Kit with Random Hexamers protocol and diluted with nuclease free water.  
1335 RT-qPCR was prepared for each sample in triplicate with TaqMan probes for 20  $\mu$ l reactions using Taqman Gene  
1336 Expression Mastermix. Detection was prepared on StepOne Plus under standard cycling conditions with *Gapdh*  
1337 samples as control. Plate data was analyzed with Applied Biosystems Expression Suite v1.1 and expression data  
1338 was visualized in Microsoft Excel.

1339 For Figure S1C: Naive conversion and control cell cultures were washed with PBS then total RNA was prepared with  
1340 TRizol standard techniques and finalized in Ambion RNasecure. cDNA was prepared from total RNAs using  
1341 Superscript Reverse Transcriptase III FS Kit with Random Hexamers protocol. RT-qPCR was prepared for each  
1342 sample in triplicate with standard fast reaction protocols in TaqMan Universal Fast Mastermix for 10ul reactions  
1343 with TaqMan probes in 384W plate and run on Applied Biosystems 7900HT. Plate data was analyzed with SDS  
1344 software and expression data was visualized in Microsoft Excel.
